# Supplementary material for: Lens orientalis Contributes Quantitative Trait Loci and Candidate Genes Associated With Ascochyta Blight Resistance in Lentil
Source: Front Plant Sci. 2021 Aug 26;12:703283. doi: 10.3389/fpls.2021.703283 (PMC8442733; doi:10.3389/fpls.2021.703283)
Supplement: Supplementary file 2 [file Table_2.XLSX]

## Sheet: Sheet1
Supplementary table 2: Details of SNP loci, Linkage groups and corresponding coordinates on the lentil genome v1.2
SNP Locus	Linkage group	Position (cM)	Chromosome/Psuedomolecule of lentil genome v1.2
scaffold8902_Locus_5288_1_58.4_COMPLEX	LG1	0	LcChr1
scaffold8901_Locus_5288_0_59.5_COMPLEX	LG1	1e-06	LcChr1
Locus_617_Contig1	LG1	0.490214	LcChr1
Locus_617_Contig1	LG1	0.490215	LcChr1
Locus_617_Contig1	LG1	0.490216	LcChr1
Locus_617_Contig1	LG1	0.490217	LcChr1
Locus_617_Contig1	LG1	0.490218	LcChr1
Locus_617_Contig1	LG1	0.490219	LcChr1
Locus_617_Contig1	LG1	0.49022	LcChr1
Locus_617_Contig1	LG1	0.490221	LcChr1
Locus_11549_Contig1	LG1	0.985287	LcChr1
Locus_11549_Contig1	LG1	0.985288	LcChr1
Locus_11549_Contig1	LG1	0.985289	LcChr1
Locus_11549_Contig1	LG1	0.98529	LcChr1
Locus_11549_Contig1	LG1	0.985291	LcChr1
Locus_11549_Contig1	LG1	0.985292	LcChr1
scaffold843_Locus_283_0_56.4_COMPLEX	LG1	0.985293	LcChr1
scaffold843_Locus_283_0_56.4_COMPLEX	LG1	0.985294	LcChr1
scaffold843_Locus_283_0_56.4_COMPLEX	LG1	0.985295	LcChr1
scaffold843_Locus_283_0_56.4_COMPLEX	LG1	0.985296	LcChr1
scaffold843_Locus_283_0_56.4_COMPLEX	LG1	0.985297	LcChr1
scaffold843_Locus_283_0_56.4_COMPLEX	LG1	0.985298	LcChr1
scaffold843_Locus_283_0_56.4_COMPLEX	LG1	0.985299	LcChr1
C213398_57.0	LG1	1.43986	LcChr1
C213398_57.0	LG1	1.43986	LcChr1
Locus_14496_Contig1	LG1	1.43986	LcChr1
C213398_57.0	LG1	1.43986	LcChr1
C213398_57.0	LG1	1.43986	LcChr1
C213398_57.0	LG1	1.43986	LcChr1
C213398_57.0	LG1	1.43986	LcChr1
C213576_61.0	LG1	2.44	LcChr1
C216160_53.0	LG1	2.44	LcChr1
C206700_55.0	LG1	2.44	LcChr1
C216160_53.0	LG1	2.44	LcChr1
C188842_52.0	LG1	5.50506	LcChr1
C188842_52.0	LG1	5.50506	LcChr1
C188842_52.0	LG1	5.50506	LcChr1
C188842_52.0	LG1	5.50506	LcChr1
C183806_58.0	LG1	5.98585	LcChr1
C183806_58.0	LG1	5.98585	LcChr1
C183806_58.0	LG1	5.98585	LcChr1
C183806_58.0	LG1	5.98585	LcChr1
C165530_50.0	LG1	5.98585	LcChr1
C153694_56.0	LG1	5.98585	LcChr1
scaffold21717_Locus_31075_0_56.4_LINEAR	LG1	6.92054	LcChr1
C209254_57.0	LG1	6.92054	LcChr1
C209254_57.0	LG1	6.92055	LcChr1
C207690_35.0	LG1	8.36325	LcChr1
C178052_58.0	LG1	8.36326	LcChr1
C59562_19.0	LG1	8.36326	LcChr1
C178052_58.0	LG1	8.36326	LcChr1
C59562_19.0	LG1	8.36326	LcChr1
C59562_19.0	LG1	8.36326	LcChr1
C59562_19.0	LG1	8.36326	LcChr1
C207690_35.0	LG1	8.36326	LcChr1
C207760_53.0	LG1	11.7666	LcChr1
C211206_60.0	LG1	14.9969	LcChr1
scaffold8483_Locus_4668_1_57.5_FORK	LG1	17.0388	LcChr1
scaffold20353_Locus_27607_0_29.1_LINEAR	LG1	17.4853	LcChr5
C195642_59.0	LG1	17.9707	LcContig22625
C214790_58.0	LG1	17.9707	LcChr1
C214790_58.0	LG1	17.9707	LcChr1
C203530_60.0	LG1	17.9707	LcChr1
Locus_14398_Contig1	LG1	18.4562	LcChr1
C201264_61.0	LG1	18.4562	LcChr1
C211610_57.0	LG1	18.4562	LcChr1
C211610_57.0	LG1	18.4562	LcChr1
scaffold10868_Locus_8214_0_57.4_COMPLEX	LG1	18.4562	LcChr1
C211596_51.0	LG1	22.1471	LcChr1
C212610_61.0	LG1	22.1471	LcChr1
C212610_61.0	LG1	22.1471	LcChr1
scaffold22926_Locus_34390_1_50.8_FORK	LG1	23.0818	LcChr1
scaffold25459_Locus_48226_0_57.6_LINEAR	LG1	23.0818	LcChr1
scaffold25459_Locus_48226_0_57.6_LINEAR	LG1	23.0818	LcChr1
scaffold22926_Locus_34390_1_50.8_FORK	LG1	23.0818	LcChr1
scaffold25459_Locus_48226_0_57.6_LINEAR	LG1	23.0818	LcChr1
scaffold25459_Locus_48226_0_57.6_LINEAR	LG1	23.0818	LcChr1
scaffold24064_Locus_38293_0_59.0_LINEAR	LG1	23.5055	LcChr1
scaffold24064_Locus_38293_0_59.0_LINEAR	LG1	23.5055	LcChr1
scaffold24064_Locus_38293_0_59.0_LINEAR	LG1	23.5055	LcChr1
scaffold24064_Locus_38293_0_59.0_LINEAR	LG1	23.5055	LcChr1
scaffold24064_Locus_38293_0_59.0_LINEAR	LG1	23.5055	LcChr1
C212732_60.0	LG1	24.8572	LcChr1
C212732_60.0	LG1	24.8572	LcChr1
scaffold23321_Locus_35659_0_37.2_LINEAR	LG1	24.8572	LcChr1
C169058_53.0	LG1	24.8572	LcChr1
scaffold15888_Locus_17561_0_61.5_BUBBLE	LG1	25.2882	LcChr1
scaffold18979_Locus_24491_0_55.9_COMPLEX	LG1	25.2882	LcChr1
scaffold18979_Locus_24491_0_55.9_COMPLEX	LG1	25.2882	LcChr1
scaffold4109_Locus_1439_1_61.3_COMPLEX	LG1	26.1287	LcChr1
C197814_50.0	LG1	26.1287	LcChr1
Locus_23238_Contig1	LG1	26.5453	LcChr1
Locus_23238_Contig1	LG1	26.5453	LcChr1
Locus_23238_Contig1	LG1	26.5453	LcChr1
Locus_23238_Contig1	LG1	26.5453	LcChr1
Locus_23238_Contig1	LG1	26.5453	LcChr1
Locus_23238_Contig1	LG1	26.5453	LcChr1
Locus_23238_Contig1	LG1	26.5453	LcChr1
Locus_23238_Contig1	LG1	26.5453	LcChr1
Locus_23238_Contig1	LG1	26.5453	LcChr1
Locus_23238_Contig1	LG1	26.5453	LcChr1
C199808_61.0	LG1	28.7019	LcChr1
C216242_61.0	LG1	28.7019	LcChr1
C216242_61.0	LG1	28.7019	LcChr1
C216242_61.0	LG1	28.7019	LcChr1
C199808_61.0	LG1	28.7019	LcChr1
C212238_61.0	LG1	29.1329	LcChr1
C212238_61.0	LG1	29.1329	LcChr1
C212238_61.0	LG1	29.1329	LcChr1
C212238_61.0	LG1	29.1329	LcChr1
C212238_61.0	LG1	29.1329	LcChr1
C212238_61.0	LG1	29.1329	LcChr1
C212238_61.0	LG1	29.1329	LcChr1
C210324_53.0	LG1	29.1329	LcChr1
C210324_53.0	LG1	29.1329	LcChr1
C210324_53.0	LG1	29.1329	LcChr1
C210324_53.0	LG1	29.1329	LcChr1
C190100_58.0	LG1	29.1329	LcChr1
scaffold25370_Locus_46394_0_60.0_LINEAR	LG1	29.1329	LcChr1
C210324_53.0	LG1	29.1329	LcChr1
C210324_53.0	LG1	29.1329	LcChr1
C210324_53.0	LG1	29.1329	LcChr1
C210324_53.0	LG1	29.1329	LcChr1
scaffold22672_Locus_33647_0_58.1_LINEAR	LG1	29.1329	LcChr1
scaffold8108_Locus_4126_0_57.6_COMPLEX	LG1	29.1329	LcChr1
scaffold1313_Locus_440_0_65.6_COMPLEX	LG1	31.0947	LcChr1
scaffold1313_Locus_440_0_65.6_COMPLEX	LG1	31.0947	LcChr1
scaffold1313_Locus_440_0_65.6_COMPLEX	LG1	31.0947	LcChr1
scaffold1313_Locus_440_0_65.6_COMPLEX	LG1	31.0947	LcChr1
scaffold1313_Locus_440_0_65.6_COMPLEX	LG1	31.0947	LcChr1
scaffold1313_Locus_440_0_65.6_COMPLEX	LG1	31.0947	LcChr1
C186308_68.0	LG1	32.9474	LcChr1
C209576_58.0	LG1	33.3712	LcChr1
C209576_58.0	LG1	33.3712	LcChr1
C209576_58.0	LG1	33.3712	LcChr1
C209576_58.0	LG1	33.3712	LcChr1
C209576_58.0	LG1	33.3712	LcChr1
C209576_58.0	LG1	33.3712	LcChr1
C209576_58.0	LG1	33.3712	LcChr1
C209576_58.0	LG1	33.3712	LcChr1
scaffold24903_Locus_42256_0_60.4_LINEAR	LG1	34.226	LcChr1
C198066_60.0	LG1	34.657	LcChr1
C198066_60.0	LG1	34.657	LcChr1
C198066_60.0	LG1	34.657	LcChr1
C198066_60.0	LG1	34.657	LcChr1
C198066_60.0	LG1	34.657	LcChr1
scaffold24903_Locus_42256_0_60.4_LINEAR	LG1	34.657	LcChr1
scaffold24903_Locus_42256_0_60.4_LINEAR	LG1	34.657	LcChr1
scaffold18820_Locus_24124_0_60.0_LINEAR	LG1	35.6571	LcChr1
scaffold18820_Locus_24124_0_60.0_LINEAR	LG1	35.6571	LcChr1
C213592_59.0	LG1	35.6571	LcChr1
scaffold19685_Locus_26041_1_61.1_COMPLEX	LG1	36.6281	LcChr1
scaffold9159_Locus_5608_0_56.0_COMPLEX	LG1	36.6281	LcChr1
scaffold9159_Locus_5608_0_56.0_COMPLEX	LG1	36.6281	LcChr1
scaffold9159_Locus_5608_0_56.0_COMPLEX	LG1	36.6281	LcChr1
scaffold9159_Locus_5608_0_56.0_COMPLEX	LG1	36.6281	LcChr1
scaffold14516_Locus_14816_0_59.0_LINEAR	LG1	36.6281	LcChr1
scaffold14516_Locus_14816_0_59.0_LINEAR	LG1	36.6281	LcChr1
scaffold14516_Locus_14816_0_59.0_LINEAR	LG1	36.6281	LcChr1
scaffold14516_Locus_14816_0_59.0_LINEAR	LG1	36.6281	LcChr1
scaffold14516_Locus_14816_0_59.0_LINEAR	LG1	36.6281	LcChr1
scaffold14516_Locus_14816_0_59.0_LINEAR	LG1	36.6281	LcChr1
scaffold14516_Locus_14816_0_59.0_LINEAR	LG1	36.6281	LcChr1
scaffold24145_Locus_38546_0_60.5_LINEAR	LG1	37.4616	LcChr1
scaffold24145_Locus_38546_0_60.5_LINEAR	LG1	37.4616	LcChr1
scaffold24145_Locus_38546_0_60.5_LINEAR	LG1	37.4616	LcChr1
scaffold24145_Locus_38546_0_60.5_LINEAR	LG1	37.4616	LcChr1
scaffold24145_Locus_38546_0_60.5_LINEAR	LG1	37.4616	LcChr1
scaffold24145_Locus_38546_0_60.5_LINEAR	LG1	37.4616	LcChr1
scaffold24145_Locus_38546_0_60.5_LINEAR	LG1	37.4616	LcChr1
scaffold24145_Locus_38546_0_60.5_LINEAR	LG1	37.4616	LcChr1
scaffold24145_Locus_38546_0_60.5_LINEAR	LG1	37.4616	LcChr1
scaffold24145_Locus_38546_0_60.5_LINEAR	LG1	37.4616	LcChr1
scaffold24145_Locus_38546_0_60.5_LINEAR	LG1	37.4616	LcChr1
scaffold3109_Locus_1074_0_55.8_FORK	LG1	37.4616	LcChr1
scaffold3109_Locus_1074_0_55.8_FORK	LG1	37.4616	LcChr1
Locus_2760_Contig1	LG1	37.4616	LcChr1
Locus_2760_Contig1	LG1	37.4616	LcChr1
Locus_2760_Contig1	LG1	37.4616	LcChr1
Locus_2760_Contig1	LG1	37.4616	LcChr1
Locus_2760_Contig1	LG1	37.4616	LcChr1
Locus_1697_Contig1	LG1	37.8783	LcChr1
Locus_1697_Contig1	LG1	37.8783	LcChr1
Locus_1697_Contig1	LG1	37.8783	LcChr1
Locus_1697_Contig1	LG1	37.8783	LcChr1
Locus_2760_Contig1	LG1	37.8783	LcChr1
Locus_2760_Contig1	LG1	37.8783	LcChr1
scaffold14516_Locus_14816_0_59.0_LINEAR	LG1	37.8783	LcChr1
scaffold14516_Locus_14816_0_59.0_LINEAR	LG1	37.8783	LcChr1
scaffold22314_Locus_32598_0_56.9_FORK	LG1	38.7187	LcChr1
C187886_45.0	LG1	38.7187	LcChr1
C187886_45.0	LG1	38.7187	LcChr1
scaffold22314_Locus_32598_0_56.9_FORK	LG1	38.7187	LcChr1
scaffold8377_Locus_4511_0_57.9_COMPLEX	LG1	39.1389	LcChr1
C207488_59.0	LG1	39.1389	LcChr1
scaffold23345_Locus_35754_0_54.9_LINEAR	LG1	39.1389	LcChr1
scaffold23345_Locus_35754_0_54.9_LINEAR	LG1	39.1389	LcChr1
scaffold23345_Locus_35754_0_54.9_LINEAR	LG1	39.1389	LcChr1
scaffold6811_Locus_2651_0_52.2_COMPLEX	LG1	39.1389	LcChr1
scaffold8655_Locus_4920_0_59.0_FORK	LG1	39.6062	LcChr1
C202916_61.0	LG1	40.6164	LcChr1
C202916_61.0	LG1	40.6164	LcChr1
C209780_57.0	LG1	41.1115	LcChr1
scaffold15039_Locus_15747_0_56.7_LINEAR	LG1	41.1115	LcChr1
scaffold15039_Locus_15747_0_56.7_LINEAR	LG1	41.1115	LcChr1
scaffold7265_Locus_2943_0_46.9_LINEAR	LG1	41.5579	LcChr1
scaffold7265_Locus_2943_0_46.9_LINEAR	LG1	41.5579	LcChr1
scaffold7265_Locus_2943_0_46.9_LINEAR	LG1	41.5579	LcChr1
C212882_60.0	LG1	42.4055	LcChr1
C212882_60.0	LG1	42.4055	LcChr1
C212882_60.0	LG1	42.4055	LcChr1
C212882_60.0	LG1	42.4055	LcChr1
C212882_60.0	LG1	42.4055	LcChr1
C212882_60.0	LG1	42.4055	LcChr1
C212882_60.0	LG1	42.4055	LcChr1
C212882_60.0	LG1	42.4055	LcChr1
C212882_60.0	LG1	42.4055	LcChr1
C212882_60.0	LG1	42.4055	LcChr1
C207348_58.0	LG1	46.5818	LcChr1
C207348_58.0	LG1	46.5818	LcChr1
C207348_58.0	LG1	46.5818	LcChr1
C207348_58.0	LG1	46.5818	LcChr1
C207348_58.0	LG1	46.5818	LcChr1
C207348_58.0	LG1	46.5818	LcChr1
scaffold4679_Locus_1673_0_56.7_COMPLEX	LG1	46.5818	LcChr1
scaffold4679_Locus_1673_0_56.7_COMPLEX	LG1	46.5818	LcChr1
scaffold4679_Locus_1673_0_56.7_COMPLEX	LG1	46.5818	LcChr1
scaffold4679_Locus_1673_0_56.7_COMPLEX	LG1	46.5818	LcChr1
scaffold4679_Locus_1673_0_56.7_COMPLEX	LG1	46.5818	LcChr1
scaffold21347_Locus_30137_0_55.6_LINEAR	LG1	46.5818	LcChr1
scaffold21347_Locus_30137_0_55.6_LINEAR	LG1	46.5818	LcChr1
C176398_57.0	LG1	46.5818	LcChr1
C176398_57.0	LG1	46.5818	LcChr1
C176398_57.0	LG1	46.5818	LcChr1
C214166_53.0	LG1	46.5818	LcChr1
C214166_53.0	LG1	46.5818	LcChr1
C214166_53.0	LG1	46.5818	LcChr1
C211950_54.0	LG1	47.4515	LcChr1
scaffold10619_Locus_7851_0_55.5_COMPLEX	LG1	48.3136	LcChr1
C195906_60.0	LG1	48.3137	LcChr1
C195906_60.0	LG1	48.3137	LcChr1
C195906_60.0	LG1	48.3137	LcChr1
C195906_60.0	LG1	48.3137	LcChr1
C195906_60.0	LG1	48.3137	LcChr1
scaffold3235_Locus_1127_2_53.8_COMPLEX	LG1	48.3137	LcChr1
scaffold3244_Locus_1129_4_53.2_COMPLEX	LG1	48.3137	LcChr1
scaffold15171_Locus_16072_0_48.0_LINEAR	LG1	48.741	LcChr1
scaffold10619_Locus_7851_0_55.5_COMPLEX	LG1	48.741	LcChr1
C196906_58.0	LG1	48.741	LcChr1
C196906_58.0	LG1	48.741	LcChr1
scaffold15171_Locus_16072_0_48.0_LINEAR	LG1	48.741	LcChr1
scaffold15171_Locus_16072_0_48.0_LINEAR	LG1	48.741	LcChr1
Locus_2281_Contig1	LG1	48.741	LcChr1
C196906_58.0	LG1	48.741	LcChr1
C196906_58.0	LG1	48.741	LcChr1
C196906_58.0	LG1	48.741	LcChr1
C196906_58.0	LG1	48.741	LcChr1
C196906_58.0	LG1	48.741	LcChr1
C196906_58.0	LG1	48.741	LcChr1
C196906_58.0	LG1	48.741	LcChr1
C196906_58.0	LG1	48.741	LcChr1
Locus_2647_Contig1	LG1	49.5814	LcChr1
Locus_2647_Contig1	LG1	49.5814	LcChr1
Locus_2647_Contig1	LG1	49.5815	LcChr1
scaffold14866_Locus_15420_0_60.1_FORK	LG1	50.0052	LcChr1
C203134_60.0	LG1	50.4362	LcChr1
C203134_60.0	LG1	50.4362	LcChr1
C203134_60.0	LG1	50.4362	LcChr1
C203134_60.0	LG1	50.4362	LcChr1
C203134_60.0	LG1	50.4362	LcChr1
C203134_60.0	LG1	50.4362	LcChr1
C212782_59.0	LG1	50.4362	LcChr1
Locus_2560_Contig1	LG1	50.8529	LcChr1
C214200_59.0	LG1	50.8529	LcChr1
scaffold21091_Locus_29518_0_39.3_LINEAR	LG1	50.8529	LcChr1
scaffold25114_Locus_43704_0_53.6_LINEAR	LG1	50.8529	LcChr1
C202490_55.0	LG1	50.8529	LcChr1
C202490_55.0	LG1	50.8529	LcChr1
C202490_55.0	LG1	50.8529	LcChr1
C202490_55.0	LG1	50.8529	LcChr1
C202490_55.0	LG1	50.8529	LcChr1
C202490_55.0	LG1	50.8529	LcChr1
C202490_55.0	LG1	50.8529	LcChr1
C200240_60.0	LG1	50.8529	LcChr1
C200240_60.0	LG1	50.8529	LcChr1
scaffold18339_Locus_23013_0_56.0_FORK	LG1	50.8529	LcChr1
scaffold18169_Locus_22582_0_59.2_LINEAR	LG1	50.8529	LcChr1
C167520_58.0	LG1	50.8529	LcChr1
C200626_58.0	LG1	50.8529	LcChr1
scaffold24924_Locus_42372_0_54.5_LINEAR	LG1	50.8529	LcContig34982
scaffold24924_Locus_42372_0_54.5_LINEAR	LG1	50.8529	LcContig34982
scaffold24924_Locus_42372_0_54.5_LINEAR	LG1	50.8529	LcContig34982
C202790_57.0	LG1	50.8529	LcChr1
Locus_2560_Contig1	LG1	50.8529	LcChr1
Locus_2560_Contig1	LG1	50.8529	LcChr1
Locus_770_Contig1	LG1	50.8529	LcChr1
C215308_60.0	LG1	50.8529	LcChr1
C215308_60.0	LG1	50.8529	LcChr1
C197916_51.0	LG1	50.8529	LcChr1
C197916_51.0	LG1	50.8529	LcChr1
C207438_60.0	LG1	50.8529	LcChr1
C207438_60.0	LG1	50.8529	LcChr1
Locus_12421_Contig1	LG1	50.853	LcChr1
scaffold18339_Locus_23013_0_56.0_FORK	LG1	50.853	LcChr1
Locus_1283_Contig1	LG1	50.853	LcChr1
C197916_51.0	LG1	50.853	LcChr1
C197916_51.0	LG1	50.853	LcChr1
C197916_51.0	LG1	50.853	LcChr1
C197916_51.0	LG1	50.853	LcChr1
scaffold11553_Locus_9344_1_58.3_COMPLEX	LG1	51.7005	LcChr1
scaffold18260_Locus_22806_0_60.3_FORK	LG1	63.0689	LcChr1
scaffold18260_Locus_22806_0_60.3_FORK	LG1	63.0689	LcChr1
scaffold18260_Locus_22806_0_60.3_FORK	LG1	63.0689	LcChr1
scaffold18260_Locus_22806_0_60.3_FORK	LG1	63.0689	LcChr1
scaffold10369_Locus_7473_0_54.8_LINEAR	LG2	0	LcChr3
scaffold10369_Locus_7473_0_54.8_LINEAR	LG2	1e-06	LcChr3
scaffold10369_Locus_7473_0_54.8_LINEAR	LG2	2e-06	LcChr3
scaffold10369_Locus_7473_0_54.8_LINEAR	LG2	3e-06	LcChr3
scaffold20360_Locus_27621_0_62.3_COMPLEX	LG2	4e-06	LcChr3
scaffold20360_Locus_27621_0_62.3_COMPLEX	LG2	5e-06	LcChr3
scaffold20360_Locus_27621_0_62.3_COMPLEX	LG2	6e-06	LcChr3
scaffold20360_Locus_27621_0_62.3_COMPLEX	LG2	7e-06	LcChr3
scaffold20360_Locus_27621_0_62.3_COMPLEX	LG2	8e-06	LcChr3
C209334_62.0	LG2	0.400018	LcChr3
C209334_62.0	LG2	0.400019	LcChr3
C209334_62.0	LG2	0.40002	LcChr3
scaffold19431_Locus_25463_0_54.7_COMPLEX	LG2	0.400021	LcChr3
scaffold19431_Locus_25463_0_54.7_COMPLEX	LG2	0.400022	LcChr3
scaffold19431_Locus_25463_0_54.7_COMPLEX	LG2	0.400023	LcChr3
C190330_56.0	LG2	0.400024	LcChr3
C190330_56.0	LG2	0.400025	LcChr3
C209334_62.0	LG2	0.400026	LcChr3
C190330_56.0	LG2	0.400027	LcChr3
C190330_56.0	LG2	0.400028	LcChr3
C190330_56.0	LG2	0.400029	LcChr3
C190330_56.0	LG2	0.40003	LcChr3
scaffold10369_Locus_7473_0_54.8_LINEAR	LG2	0.400031	LcChr3
scaffold10369_Locus_7473_0_54.8_LINEAR	LG2	0.400032	LcChr3
scaffold10369_Locus_7473_0_54.8_LINEAR	LG2	0.400033	LcChr3
scaffold10369_Locus_7473_0_54.8_LINEAR	LG2	0.400034	LcChr3
C206904_60.0	LG2	0.827395	LcChr3
Locus_1408_Contig1	LG2	0.827396	LcChr3
C206904_60.0	LG2	0.827397	LcChr3
C206904_60.0	LG2	0.827398	LcChr3
C206904_60.0	LG2	0.827399	LcChr3
C206904_60.0	LG2	0.8274	LcChr3
C206904_60.0	LG2	0.827401	LcChr3
C206904_60.0	LG2	0.827402	LcChr3
C206904_60.0	LG2	0.827403	LcChr3
C206904_60.0	LG2	0.827404	LcChr3
scaffold13195_Locus_12272_0_56.9_BUBBLE	LG2	2.24288	LcChr3
C165168_47.0	LG2	3.6996	LcChr3
Locus_10019_Contig1	LG2	4.15007	LcChr3
Locus_10019_Contig1	LG2	4.15007	LcChr3
C173838_53.0	LG2	8.00383	LcChr3
scaffold25359_Locus_46292_0_51.6_LINEAR	LG2	11.3105	LcChr3
scaffold16910_Locus_19745_0_53.0_FORK	LG2	11.757	LcChr3
scaffold11722_Locus_9598_0_50.7_COMPLEX	LG2	12.2074	LcChr3
scaffold11722_Locus_9598_0_50.7_COMPLEX	LG2	12.2074	LcChr3
C209238_61.0	LG2	12.614	LcChr3
C212788_61.0	LG2	14.2274	LcChr3
C213674_60.0	LG2	14.6211	LcChr3
C213674_60.0	LG2	14.6211	LcChr3
C210348_58.0	LG2	17.8073	LcChr3
Locus_1335_Contig1	LG2	17.8073	LcChr3
Locus_1335_Contig1	LG2	17.8073	LcChr3
scaffold20538_Locus_28046_0_56.6_LINEAR	LG2	18.8383	LcChr3
C176384_52.0	LG2	18.8383	LcChr3
scaffold20538_Locus_28046_0_56.6_LINEAR	LG2	18.8383	LcChr3
scaffold20538_Locus_28046_0_56.6_LINEAR	LG2	18.8383	LcChr3
scaffold20538_Locus_28046_0_56.6_LINEAR	LG2	18.8383	LcChr3
scaffold20538_Locus_28046_0_56.6_LINEAR	LG2	18.8383	LcChr3
Locus_24644_Contig1	LG2	18.8383	LcChr3
scaffold16547_Locus_18962_0_59.1_COMPLEX	LG2	18.8383	LcChr3
scaffold16547_Locus_18962_0_59.1_COMPLEX	LG2	18.8383	LcChr3
scaffold16547_Locus_18962_0_59.1_COMPLEX	LG2	18.8383	LcChr3
scaffold8538_Locus_4742_0_60.4_FORK	LG2	18.8383	LcContig379530
scaffold8538_Locus_4742_0_60.4_FORK	LG2	18.8383	LcContig379530
scaffold8538_Locus_4742_0_60.4_FORK	LG2	18.8383	LcContig379530
scaffold8538_Locus_4742_0_60.4_FORK	LG2	18.8383	LcContig379530
scaffold8538_Locus_4742_0_60.4_FORK	LG2	18.8383	LcContig379530
scaffold8538_Locus_4742_0_60.4_FORK	LG2	18.8383	LcContig379530
C207350_46.0	LG2	19.3538	LcChr3
C207350_46.0	LG2	19.3538	LcChr3
C207350_46.0	LG2	19.3538	LcChr3
C207350_46.0	LG2	19.3538	LcChr3
C207350_46.0	LG2	19.3538	LcChr3
scaffold16807_Locus_19498_0_42.2_LINEAR	LG2	19.3538	LcContig379530
C207350_46.0	LG2	19.3538	LcChr3
scaffold25449_Locus_47931_0_60.4_LINEAR	LG2	21.2239	LcContig239886
scaffold25449_Locus_47931_0_60.4_LINEAR	LG2	21.2239	LcContig239886
scaffold25449_Locus_47931_0_60.4_LINEAR	LG2	21.2239	LcContig239886
scaffold25449_Locus_47931_0_60.4_LINEAR	LG2	21.2239	LcContig239886
scaffold25449_Locus_47931_0_60.4_LINEAR	LG2	21.2239	LcContig239886
scaffold25449_Locus_47931_0_60.4_LINEAR	LG2	21.2239	LcContig239886
scaffold25449_Locus_47931_0_60.4_LINEAR	LG2	21.2239	LcContig239886
scaffold25449_Locus_47931_0_60.4_LINEAR	LG2	21.2239	LcContig239886
scaffold25449_Locus_47931_0_60.4_LINEAR	LG2	21.2239	LcContig239886
C206432_56.0	LG2	22.0714	LcChr3
C206432_56.0	LG2	22.0714	LcChr3
C206432_56.0	LG2	22.0714	LcChr3
C206432_56.0	LG2	22.0714	LcChr3
C210244_47.0	LG2	26.0011	LcChr3
C210244_47.0	LG2	26.0011	LcChr3
C201630_58.0	LG2	26.4773	LcChr2
scaffold14925_Locus_15536_0_53.0_LINEAR	LG2	26.4773	LcChr3
scaffold14925_Locus_15536_0_53.0_LINEAR	LG2	26.4773	LcChr3
scaffold14925_Locus_15536_0_53.0_LINEAR	LG2	26.4773	LcChr3
scaffold14925_Locus_15536_0_53.0_LINEAR	LG2	26.4773	LcChr3
scaffold14925_Locus_15536_0_53.0_LINEAR	LG2	26.4773	LcChr3
scaffold11714_Locus_9589_0_53.3_LINEAR	LG2	26.9875	LcChr7
scaffold11714_Locus_9589_0_53.3_LINEAR	LG2	26.9875	LcChr7
C215356_61.0	LG2	27.9977	LcChr3
C215356_61.0	LG2	27.9977	LcChr3
C215356_61.0	LG2	27.9977	LcChr3
C215356_61.0	LG2	27.9977	LcChr3
C215356_61.0	LG2	27.9977	LcChr3
C215356_61.0	LG2	27.9977	LcChr3
C215356_61.0	LG2	27.9977	LcChr3
C215356_61.0	LG2	27.9977	LcChr3
C215356_61.0	LG2	27.9977	LcChr3
C215356_61.0	LG2	27.9977	LcChr3
C205828_59.0	LG2	28.8987	LcChr3
C214356_59.0	LG2	29.3617	LcChr3
C214356_59.0	LG2	29.3617	LcChr3
C214356_59.0	LG2	29.3617	LcChr3
C214356_59.0	LG2	29.3617	LcChr3
C214356_59.0	LG2	29.3617	LcChr3
C214356_59.0	LG2	29.3617	LcChr3
C214356_59.0	LG2	29.3617	LcChr3
C214356_59.0	LG2	29.3617	LcChr3
C214356_59.0	LG2	29.3617	LcChr3
C214356_59.0	LG2	29.3617	LcChr3
C214356_59.0	LG2	29.3617	LcChr3
C189012_54.0	LG2	30.8327	LcContig91651
C203228_56.0	LG2	30.8327	LcChr2
C208684_61.0	LG2	30.8327	LcChr3
scaffold3280_Locus_1142_1_54.8_COMPLEX	LG2	30.8327	LcChr3
Locus_453_Contig1	LG2	30.8327	LcChr3
C210080_59.0	LG2	30.8327	LcChr3
C207614_61.0	LG2	31.3278	LcChr3
C207614_61.0	LG2	31.3278	LcChr3
C207614_61.0	LG2	31.3278	LcChr3
C207614_61.0	LG2	31.3278	LcChr3
C207614_61.0	LG2	31.3278	LcChr3
C204908_58.0	LG2	31.804	LcChr3
C203762_57.0	LG2	31.804	LcChr3
C203762_57.0	LG2	31.804	LcChr3
C203762_57.0	LG2	31.804	LcChr3
C203762_57.0	LG2	31.804	LcChr3
C203762_57.0	LG2	31.804	LcChr3
C194688_59.0	LG2	33.5747	LcChr3
C194688_59.0	LG2	33.5747	LcChr3
C194688_59.0	LG2	33.5747	LcChr3
scaffold25475_Locus_48731_0_45.3_LINEAR	LG2	33.5747	LcChr3
scaffold25475_Locus_48731_0_45.3_LINEAR	LG2	33.5747	LcChr3
C178976_60.0	LG2	34.0377	LcChr3
scaffold25475_Locus_48731_0_45.3_LINEAR	LG2	34.0377	LcChr3
Locus_3607_Contig1	LG2	34.4964	LcChr3
scaffold24136_Locus_38522_0_60.8_COMPLEX	LG2	34.9131	LcChr3
scaffold24136_Locus_38522_0_60.8_COMPLEX	LG2	34.9131	LcChr3
scaffold15760_Locus_17290_0_60.4_FORK	LG2	36.277	LcChr3
C214118_51.0	LG2	36.74	LcChr3
C214118_51.0	LG2	36.74	LcChr3
scaffold24807_Locus_41693_0_46.1_LINEAR	LG2	37.6251	LcChr3
C175634_54.0	LG2	37.6251	LcChr3
C184300_53.0	LG2	38.0488	LcChr3
C214224_57.0	LG2	38.0488	LcContig589698
C187390_59.0	LG2	38.4874	LcChr3
Locus_23696_Contig1	LG2	38.9682	LcChr3
Locus_23696_Contig1	LG2	38.9682	LcChr3
C177218_59.0	LG2	38.9682	LcChr3
C169752_44.0	LG2	38.9682	LcChr3
C192842_59.0	LG2	38.9682	LcChr3
Locus_13747_Contig1	LG2	38.9682	LcChr3
C202014_56.0	LG2	41.0528	LcChr3
scaffold11802_Locus_9724_1_53.8_COMPLEX	LG2	41.0528	LcChr3
scaffold11802_Locus_9724_1_53.8_COMPLEX	LG2	41.0528	LcChr3
C164222_60.0	LG2	41.0528	LcChr3
C200362_59.0	LG2	41.0528	LcChr3
scaffold7352_Locus_3071_0_40.7_COMPLEX	LG2	41.5032	LcChr3
scaffold359_Locus_125_2_38.7_COMPLEX	LG2	41.5032	LcContig5811
scaffold7352_Locus_3071_0_40.7_COMPLEX	LG2	41.5032	LcChr3
C187658_58.0	LG2	42.3508	LcChr3
scaffold18270_Locus_22818_0_55.7_LINEAR	LG2	42.7745	LcChr3
scaffold18270_Locus_22818_0_55.7_LINEAR	LG2	42.7745	LcChr3
C170458_59.0	LG2	42.7745	LcChr3
C170458_59.0	LG2	42.7745	LcChr3
C198910_60.0	LG2	44.0568	LcChr3
scaffold22022_Locus_31820_0_59.7_LINEAR	LG2	44.0568	LcChr3
scaffold25520_Locus_49938_0_57.5_LINEAR	LG2	44.966	LcChr3
scaffold20212_Locus_27295_1_56.2_FORK	LG2	45.8752	LcChr3
Locus_4554_Contig1	LG2	48.0891	LcChr3
Locus_4554_Contig1	LG2	48.0891	LcChr3
C192854_59.0	LG2	48.4956	LcChr3
C192854_59.0	LG2	48.4956	LcChr3
Locus_10220_Contig1	LG2	48.4956	LcChr3
scaffold15626_Locus_17027_1_55.4_FORK	LG2	49.4481	LcChr3
scaffold15626_Locus_17027_1_55.4_FORK	LG2	49.4481	LcChr3
C202628_56.0	LG2	49.9383	LcContig12961
C202628_56.0	LG2	49.9383	LcContig12961
C202628_56.0	LG2	49.9383	LcContig12961
scaffold5149_Locus_1863_0_57.7_COMPLEX	LG2	51.395	LcChr3
Locus_3556_Contig1	LG2	51.8537	LcContig567660
Locus_3556_Contig1	LG2	51.8537	LcContig567660
Locus_3556_Contig1	LG2	51.8537	LcContig567660
Locus_3556_Contig1	LG2	51.8537	LcContig567660
C211532_60.0	LG2	51.8537	LcChr3
C211428_58.0	LG2	52.2704	LcChr3
C211428_58.0	LG2	52.2704	LcChr3
C200718_53.0	LG2	52.2704	LcChr3
Locus_2099_Contig1	LG2	52.2704	LcChr3
C200718_53.0	LG2	52.2704	LcChr3
Locus_1436_Contig1	LG2	52.2704	LcChr3
Locus_1436_Contig1	LG2	52.2704	LcChr3
Locus_1436_Contig1	LG2	52.2704	LcChr3
Locus_2099_Contig1	LG2	52.2704	LcChr3
C200718_53.0	LG2	52.2704	LcChr3
C200718_53.0	LG2	52.2704	LcChr3
Locus_1436_Contig1	LG2	52.2704	LcChr3
scaffold15593_Locus_16960_0_63.7_FORK	LG2	52.2704	LcChr3
C209950_61.0	LG2	52.6871	LcChr3
C209950_61.0	LG2	52.6871	LcChr3
C209950_61.0	LG2	52.6871	LcChr3
C209950_61.0	LG2	52.6871	LcChr3
C209950_61.0	LG2	52.6871	LcChr3
C209950_61.0	LG2	52.6871	LcChr3
Locus_1752_Contig1	LG2	53.1633	LcChr3
scaffold439_Locus_149_1_41.8_COMPLEX	LG2	53.1633	LcChr3
scaffold439_Locus_149_1_41.8_COMPLEX	LG2	53.1633	LcChr3
scaffold439_Locus_149_1_41.8_COMPLEX	LG2	53.1633	LcChr3
scaffold439_Locus_149_1_41.8_COMPLEX	LG2	53.1633	LcChr3
C213842_61.0	LG2	53.1633	LcContig198728
C213842_61.0	LG2	53.1633	LcContig198728
C213842_61.0	LG2	53.1633	LcContig198728
C212880_59.0	LG2	53.1633	LcChr3
C212880_59.0	LG2	53.1633	LcChr3
scaffold7525_Locus_3275_0_57.6_COMPLEX	LG2	53.1633	LcChr3
scaffold7525_Locus_3275_0_57.6_COMPLEX	LG2	53.1633	LcChr3
scaffold7525_Locus_3275_0_57.6_COMPLEX	LG2	53.1633	LcChr3
C182060_59.0	LG2	53.1633	LcChr3
C182060_59.0	LG2	53.1633	LcChr3
C206392_61.0	LG2	53.6736	LcContig78251
C206392_61.0	LG2	53.6736	LcContig78251
C206392_61.0	LG2	53.6736	LcContig78251
C206392_61.0	LG2	53.6736	LcContig78251
C206392_61.0	LG2	53.6736	LcContig78251
scaffold7525_Locus_3275_0_57.6_COMPLEX	LG2	53.6736	LcChr3
C212758_61.0	LG2	54.1281	LcChr3
C212758_61.0	LG2	54.1281	LcChr3
C212758_61.0	LG2	54.1281	LcChr3
C212758_61.0	LG2	54.1281	LcChr3
C212758_61.0	LG2	54.1281	LcChr3
scaffold20706_Locus_28526_0_45.3_LINEAR	LG2	55.0211	LcChr3
scaffold20706_Locus_28526_0_45.3_LINEAR	LG2	55.0211	LcChr3
scaffold20706_Locus_28526_0_45.3_LINEAR	LG2	55.0211	LcChr3
scaffold20706_Locus_28526_0_45.3_LINEAR	LG2	55.0211	LcChr3
scaffold20706_Locus_28526_0_45.3_LINEAR	LG2	55.0211	LcChr3
scaffold20706_Locus_28526_0_45.3_LINEAR	LG2	55.0211	LcChr3
C214122_59.0	LG2	55.0211	LcChr3
Locus_27718_Contig1	LG2	55.5113	LcContig15544
C209338_60.0	LG2	55.9968	LcChr3
scaffold25376_Locus_46472_0_39.2_LINEAR	LG2	55.9968	LcChr3
C209338_60.0	LG2	55.9968	LcChr3
C209338_60.0	LG2	55.9968	LcChr3
C186044_54.0	LG2	56.4513	LcChr3
C203900_59.0	LG2	56.4513	LcChr3
C197180_56.0	LG2	56.4513	LcChr3
C207980_54.0	LG2	56.4513	LcChr3
C203900_59.0	LG2	56.4513	LcChr3
C203900_59.0	LG2	56.4513	LcChr3
C203900_59.0	LG2	56.4513	LcChr3
C203900_59.0	LG2	56.4513	LcChr3
C210460_55.0	LG2	56.9275	LcChr3
C196012_59.0	LG2	56.9275	LcChr3
C196012_59.0	LG2	56.9275	LcChr3
C199840_59.0	LG2	56.9275	LcChr3
C205172_60.0	LG2	57.3549	LcContig25906
C205172_60.0	LG2	57.3549	LcContig25906
C205172_60.0	LG2	57.3549	LcContig25906
C205172_60.0	LG2	57.3549	LcContig25906
C205172_60.0	LG2	57.3549	LcContig25906
C188420_58.0	LG2	58.6157	LcChr3
C188420_58.0	LG2	58.6157	LcChr3
C212746_59.0	LG2	58.6157	LcChr3
C196024_56.0	LG2	59.9091	LcChr3
C201382_51.0	LG2	59.9091	LcChr3
scaffold14200_Locus_14227_0_59.0_FORK	LG2	59.9091	LcChr3
scaffold14200_Locus_14227_0_59.0_FORK	LG2	59.9091	LcChr3
C213264_54.0	LG2	59.9091	LcChr3
C205234_56.0	LG2	59.9091	LcChr3
C201382_51.0	LG2	59.9091	LcChr3
C167014_64.0	LG2	59.9091	LcChr3
C201382_51.0	LG2	59.9091	LcChr3
C188916_57.0	LG2	59.9091	LcChr3
C201382_51.0	LG2	59.9091	LcChr3
C201382_51.0	LG2	59.9091	LcChr3
C201382_51.0	LG2	59.9091	LcChr3
scaffold20129_Locus_27086_0_62.9_LINEAR	LG2	61.456	LcContig57368
Locus_2107_Contig1	LG2	62.52	LcChr3
scaffold19300_Locus_25189_0_57.5_LINEAR	LG2	62.52	LcChr3
scaffold19300_Locus_25189_0_57.5_LINEAR	LG2	62.52	LcChr3
scaffold19300_Locus_25189_0_57.5_LINEAR	LG2	62.52	LcChr3
scaffold19300_Locus_25189_0_57.5_LINEAR	LG2	62.52	LcChr3
scaffold19300_Locus_25189_0_57.5_LINEAR	LG2	62.52	LcChr3
scaffold19300_Locus_25189_0_57.5_LINEAR	LG2	62.52	LcChr3
C183474_62.0	LG2	66.0257	LcContig682485
C183474_62.0	LG2	66.0257	LcContig682485
C183474_62.0	LG2	66.0257	LcContig682485
scaffold12130_Locus_10327_0_56.2_COMPLEX	LG2	66.9874	LcContig76680
C209140_57.0	LG2	67.9584	LcChr3
Locus_27101_Contig1	LG2	69.3223	LcChr1
Locus_27101_Contig1	LG2	69.3223	LcChr1
Locus_27101_Contig1	LG2	69.3223	LcChr1
Locus_27101_Contig1	LG2	69.3223	LcChr1
Locus_27101_Contig1	LG2	69.3223	LcChr1
Locus_27101_Contig1	LG2	69.3223	LcChr1
Locus_27101_Contig1	LG2	69.3223	LcChr1
Locus_27101_Contig1	LG2	69.3223	LcChr1
Locus_27101_Contig1	LG2	69.3223	LcChr1
Locus_27101_Contig1	LG2	69.3223	LcChr1
Locus_27101_Contig1	LG2	69.3223	LcChr1
Locus_27101_Contig1	LG2	69.3223	LcChr1
Locus_27101_Contig1	LG2	69.3223	LcChr1
Locus_27101_Contig1	LG2	69.3223	LcChr1
Locus_27101_Contig1	LG2	69.3223	LcChr1
Locus_27101_Contig1	LG2	69.3223	LcChr1
Locus_7052_Contig1	LG2	70.1771	LcChr3
Locus_7052_Contig1	LG2	70.1771	LcChr3
Locus_7052_Contig1	LG2	70.1771	LcChr3
Locus_7052_Contig1	LG2	70.1771	LcChr3
Locus_7052_Contig1	LG2	70.1771	LcChr3
Locus_7052_Contig1	LG2	70.1771	LcChr3
C196518_55.0	LG2	70.1771	LcChr1
C196518_55.0	LG2	70.1771	LcChr1
C191432_58.0	LG2	71.1481	LcContig378652
scaffold17094_Locus_20176_1_58.2_FORK	LG2	71.669	LcChr3
scaffold17094_Locus_20176_1_58.2_FORK	LG2	71.669	LcChr3
scaffold17094_Locus_20176_1_58.2_FORK	LG2	71.669	LcChr3
scaffold2050_Locus_690_0_55.2_COMPLEX	LG2	72.7218	LcContig105899
C157382_56.0	LG2	73.2026	LcContig371913
C157382_56.0	LG2	73.2026	LcContig371913
C157382_56.0	LG2	73.2026	LcContig371913
C157382_56.0	LG2	73.2026	LcContig371913
C157382_56.0	LG2	73.2026	LcContig371913
C150490_28.0	LG2	73.2026	LcChr3
C157382_56.0	LG2	73.2026	LcContig371913
C157382_56.0	LG2	73.2026	LcContig371913
C157382_56.0	LG2	73.2026	LcContig371913
C157382_56.0	LG2	73.2026	LcContig371913
C157382_56.0	LG2	73.2026	LcContig371913
scaffold21975_Locus_31709_0_41.1_LINEAR	LG2	73.6699	LcContig262655
C210914_55.0	LG2	73.6699	LcContig112721
C170684_59.0	LG2	74.6409	LcChr3
scaffold13881_Locus_13603_0_50.6_BUBBLE	LG2	74.6409	LcContig9251
C199104_60.0	LG2	74.6409	LcChr3
C199104_60.0	LG2	74.6409	LcChr3
scaffold24486_Locus_40002_0_55.0_LINEAR	LG2	74.6409	LcChr3
C172346_49.0	LG2	75.6614	LcContig181173
C172346_49.0	LG2	75.6614	LcContig181173
C207678_45.0	LG2	76.1665	LcChr3
C175968_59.0	LG2	76.1665	LcChr3
C175968_59.0	LG2	76.1665	LcChr3
C175968_59.0	LG2	76.1665	LcChr3
C213176_60.0	LG2	76.1665	LcChr3
C190122_54.0	LG2	77.6821	LcContig34929
Locus_3175_Contig1	LG2	77.6821	LcChr3
Locus_3175_Contig1	LG2	77.6821	LcChr3
Locus_3175_Contig1	LG2	77.6821	LcChr3
Locus_3175_Contig1	LG2	77.6821	LcChr3
Locus_3175_Contig1	LG2	77.6821	LcChr3
C195706_53.0	LG2	78.1723	LcChr3
C202154_57.0	LG2	78.1723	LcChr3
C202154_57.0	LG2	78.1723	LcChr3
C202154_57.0	LG2	78.1723	LcChr3
C195706_53.0	LG2	78.1723	LcChr3
C143918_54.0	LG2	78.1723	LcChr3
C143918_54.0	LG2	78.1723	LcChr3
C143918_54.0	LG2	78.1723	LcChr3
C143918_54.0	LG2	78.1723	LcChr3
C198374_56.0	LG2	78.1723	LcChr3
C198374_56.0	LG2	78.1723	LcChr3
Locus_12339_Contig1	LG2	79.9588	LcChr3
Locus_12339_Contig1	LG2	79.9588	LcChr3
Locus_12339_Contig1	LG2	79.9588	LcChr3
Locus_12339_Contig1	LG2	79.9588	LcChr3
Locus_12339_Contig1	LG2	79.9588	LcChr3
Locus_12339_Contig1	LG2	79.9588	LcChr3
C182552_51.0	LG2	87.4865	LcChr3
C188808_45.0	LG2	87.9582	LcChr3
C188808_45.0	LG2	87.9582	LcChr3
C210806_56.0	LG2	88.9198	LcChr3
scaffold9289_Locus_5810_1_56.8_COMPLEX	LG2	88.9198	LcChr1
C192644_57.0	LG2	90.4509	LcChr3
C192644_57.0	LG2	90.4509	LcChr3
C204994_53.0	LG2	94.1418	LcChr3
C204994_53.0	LG2	94.1418	LcChr3
C204994_53.0	LG2	94.1418	LcChr3
C214898_60.0	LG3	0	LcChr2
C213718_59.0	LG3	1e-06	LcChr2
C213718_59.0	LG3	2e-06	LcChr2
C213718_59.0	LG3	3e-06	LcChr2
C213718_59.0	LG3	4e-06	LcChr2
C213718_59.0	LG3	5e-06	LcChr2
C213718_59.0	LG3	6e-06	LcChr2
C213718_59.0	LG3	7e-06	LcChr2
C152482_51.0	LG3	0.476213	LcChr2
Locus_506_Contig1	LG3	0.943517	LcChr2
C171954_58.0	LG3	0.943518	LcChr2
C212902_62.0	LG3	1.46437	LcChr2
C212902_62.0	LG3	1.46437	LcChr2
C171954_58.0	LG3	1.46437	LcChr2
C190988_54.0	LG3	5.19468	LcChr2
C190988_54.0	LG3	5.19469	LcChr2
C190988_54.0	LG3	5.19469	LcChr2
Locus_128_Contig1	LG3	5.19469	LcChr2
Locus_128_Contig1	LG3	5.19469	LcChr2
Locus_128_Contig1	LG3	5.19469	LcChr2
C192270_46.0	LG3	5.19469	LcChr2
C192270_46.0	LG3	5.19469	LcChr2
C192270_46.0	LG3	5.19469	LcChr2
C210180_54.0	LG3	7.42832	LcChr2
C210180_54.0	LG3	7.42832	LcChr2
C195454_60.0	LG3	9.76647	LcChr2
C131508_42.0	LG3	13.344	LcChr2
C197544_53.0	LG3	13.344	LcChr2
C131508_42.0	LG3	13.344	LcChr2
C181894_50.0	LG3	16.4407	LcChr2
scaffold7248_Locus_2917_0_58.2_COMPLEX	LG3	16.4407	LcChr2
scaffold6580_Locus_2547_1_57.1_BUBBLE	LG3	16.4407	LcChr2
scaffold6580_Locus_2547_1_57.1_BUBBLE	LG3	16.4407	LcChr2
C188754_58.0	LG3	16.4407	LcChr2
scaffold6580_Locus_2547_1_57.1_BUBBLE	LG3	16.4407	LcChr2
scaffold6580_Locus_2547_1_57.1_BUBBLE	LG3	16.4407	LcChr2
scaffold25312_Locus_45577_0_43.5_LINEAR	LG3	17.4935	LcChr2
C185360_56.0	LG3	17.9743	LcContig128022
C185360_56.0	LG3	17.9743	LcContig128022
C185360_56.0	LG3	17.9743	LcContig128022
C185360_56.0	LG3	17.9743	LcContig128022
C161342_39.0	LG3	17.9743	LcChr2
C161342_39.0	LG3	17.9743	LcChr2
C176528_56.0	LG3	17.9743	LcChr2
C176528_56.0	LG3	17.9743	LcChr2
C176528_56.0	LG3	17.9743	LcChr2
C131516_20.0	LG3	17.9743	LcChr2
C131516_20.0	LG3	17.9743	LcChr2
C131516_20.0	LG3	17.9743	LcChr2
C131516_20.0	LG3	17.9743	LcChr2
scaffold16685_Locus_19252_0_54.2_COMPLEX	LG3	18.4017	LcChr2
scaffold15870_Locus_17521_0_60.5_LINEAR	LG3	20.1118	LcContig847203
C193204_61.0	LG3	20.1118	LcChr2
C193204_61.0	LG3	20.1118	LcChr2
scaffold15870_Locus_17521_0_60.5_LINEAR	LG3	20.1118	LcContig847203
C193204_61.0	LG3	20.1118	LcChr2
C213776_60.0	LG3	20.9522	LcChr2
C213776_60.0	LG3	20.9522	LcChr2
C213776_60.0	LG3	20.9522	LcChr2
C213776_60.0	LG3	20.9522	LcChr2
C213776_60.0	LG3	20.9522	LcChr2
C213776_60.0	LG3	20.9522	LcChr2
C213776_60.0	LG3	20.9522	LcChr2
C213776_60.0	LG3	20.9522	LcChr2
C216186_61.0	LG3	21.3689	LcChr2
C216186_61.0	LG3	21.3689	LcChr2
C216186_61.0	LG3	21.3689	LcChr2
C216186_61.0	LG3	21.3689	LcChr2
C216186_61.0	LG3	21.3689	LcChr2
C216186_61.0	LG3	21.3689	LcChr2
C216186_61.0	LG3	21.3689	LcChr2
C216186_61.0	LG3	21.3689	LcChr2
C216186_61.0	LG3	21.3689	LcChr2
C216186_61.0	LG3	21.3689	LcChr2
C216186_61.0	LG3	21.3689	LcChr2
C216186_61.0	LG3	21.3689	LcChr2
C216186_61.0	LG3	21.3689	LcChr2
C216186_61.0	LG3	21.3689	LcChr2
C216186_61.0	LG3	21.3689	LcChr2
C216186_61.0	LG3	21.3689	LcChr2
C213776_60.0	LG3	21.3689	LcChr2
C209430_59.0	LG3	21.8406	LcChr2
scaffold24044_Locus_38221_0_58.5_BUBBLE	LG3	21.8406	LcChr2
scaffold19128_Locus_24821_0_58.3_COMPLEX	LG3	22.9397	LcChr2
scaffold19128_Locus_24821_0_58.3_COMPLEX	LG3	22.9397	LcChr2
scaffold19128_Locus_24821_0_58.3_COMPLEX	LG3	22.9397	LcChr2
C167492_52.0	LG3	22.9397	LcChr2
C206576_60.0	LG3	22.9397	LcChr2
scaffold19128_Locus_24821_0_58.3_COMPLEX	LG3	22.9397	LcChr2
C206576_60.0	LG3	22.9397	LcChr2
C206576_60.0	LG3	22.9397	LcChr2
C195686_63.0	LG3	23.9107	LcChr2
scaffold19598_Locus_25862_0_60.2_LINEAR	LG3	23.9107	LcContig380745
scaffold102_Locus_31_4_43.3_COMPLEX	LG3	23.9107	LcContig380745
scaffold102_Locus_31_4_43.3_COMPLEX	LG3	23.9107	LcContig380745
C205280_62.0	LG3	23.9107	LcChr2
C195686_63.0	LG3	23.9107	LcChr2
scaffold19598_Locus_25862_0_60.2_LINEAR	LG3	23.9107	LcContig380745
C205280_62.0	LG3	23.9107	LcChr2
C205280_62.0	LG3	23.9107	LcChr2
C201160_56.0	LG3	23.9107	LcChr2
C204826_56.0	LG3	24.3309	LcContig594189
C192652_52.0	LG3	24.3309	LcChr2
C205388_59.0	LG3	24.751	LcChr2
C205388_59.0	LG3	24.751	LcChr2
C205388_59.0	LG3	24.751	LcChr2
Locus_2876_Contig1	LG3	25.2056	LcChr2
Locus_2876_Contig1	LG3	25.2056	LcChr2
Locus_2876_Contig1	LG3	25.2056	LcChr2
C174190_61.0	LG3	25.2056	LcChr2
C174190_61.0	LG3	25.2056	LcChr2
Locus_7003_Contig1	LG3	27.5884	LcChr2
Locus_7003_Contig1	LG3	27.5884	LcChr2
Locus_10297_Contig1	LG3	28.4432	LcChr2
Locus_10297_Contig1	LG3	28.4432	LcChr2
C195476_53.0	LG3	28.8977	LcContig149571
scaffold16251_Locus_18335_0_52.9_COMPLEX	LG3	28.8977	LcContig109146
Locus_32362_Contig1	LG3	29.8069	LcChr2
scaffold25096_Locus_43559_0_42.4_LINEAR	LG3	29.8069	LcChr2
C196640_52.0	LG3	29.8069	LcChr2
C196640_52.0	LG3	29.8069	LcChr2
C196640_52.0	LG3	29.8069	LcChr2
C187842_59.0	LG3	29.8069	LcChr2
C187842_59.0	LG3	29.8069	LcChr2
Locus_32362_Contig1	LG3	29.8069	LcChr2
Locus_32362_Contig1	LG3	29.8069	LcChr2
Locus_32362_Contig1	LG3	29.8069	LcChr2
C84404_21.0	LG3	29.8069	LcChr2
C84404_21.0	LG3	29.8069	LcChr2
Locus_8710_Contig1	LG3	29.8069	LcChr2
Locus_8710_Contig1	LG3	29.8069	LcChr2
scaffold5244_Locus_1903_0_52.6_COMPLEX	LG3	32.6136	LcChr2
scaffold9052_Locus_5500_0_49.3_COMPLEX	LG3	32.6136	LcChr2
C162466_55.0	LG3	33.5311	LcChr2
C162466_55.0	LG3	33.5311	LcChr2
C162466_55.0	LG3	33.5311	LcChr2
C162466_55.0	LG3	33.5311	LcChr2
C162466_55.0	LG3	33.5311	LcChr2
C185410_59.0	LG3	33.5311	LcChr2
C202882_62.0	LG3	33.9659	LcChr2
C202882_62.0	LG3	33.9659	LcChr2
C213428_57.0	LG3	34.4289	LcChr2
C213428_57.0	LG3	34.4289	LcChr2
Locus_5114_Contig1	LG3	35.4817	LcChr2
Locus_5114_Contig1	LG3	35.4817	LcChr2
C213762_58.0	LG3	35.4817	LcChr2
C189478_64.0	LG3	35.4817	LcChr2
C215324_58.0	LG3	35.4817	LcChr2
Locus_5114_Contig1	LG3	35.4817	LcChr2
Locus_5114_Contig1	LG3	35.4817	LcChr2
Locus_5114_Contig1	LG3	35.4817	LcChr2
Locus_5114_Contig1	LG3	35.4817	LcChr2
Locus_5114_Contig1	LG3	35.4817	LcChr2
Locus_5114_Contig1	LG3	35.4817	LcChr2
scaffold16092_Locus_18029_0_50.8_COMPLEX	LG3	35.4817	LcChr2
scaffold16092_Locus_18029_0_50.8_COMPLEX	LG3	35.4817	LcChr2
scaffold16092_Locus_18029_0_50.8_COMPLEX	LG3	35.4817	LcChr2
scaffold16092_Locus_18029_0_50.8_COMPLEX	LG3	35.4817	LcChr2
scaffold16092_Locus_18029_0_50.8_COMPLEX	LG3	35.4817	LcChr2
scaffold16092_Locus_18029_0_50.8_COMPLEX	LG3	35.4817	LcChr2
C193432_61.0	LG3	35.9719	LcChr2
Locus_5114_Contig1	LG3	35.9719	LcChr2
Locus_7528_Contig1	LG3	36.3993	LcChr2
Locus_7528_Contig1	LG3	36.3993	LcChr2
C207914_61.0	LG3	36.3993	LcChr2
C207914_61.0	LG3	36.3993	LcChr2
C207914_61.0	LG3	36.3993	LcChr2
C207914_61.0	LG3	36.3993	LcChr2
C207914_61.0	LG3	36.3993	LcChr2
scaffold16480_Locus_18831_1_61.1_FORK	LG3	37.2541	LcChr2
scaffold16480_Locus_18831_1_61.1_FORK	LG3	37.2541	LcChr2
scaffold16479_Locus_18831_0_40.6_FORK	LG3	37.2541	LcChr2
scaffold16733_Locus_19387_0_57.9_COMPLEX	LG3	37.7086	LcChr2
C204898_57.0	LG3	37.7086	LcChr2
C201534_59.0	LG3	37.7086	LcChr2
scaffold21172_Locus_29732_0_58.4_FORK	LG3	39.1109	LcChr2
scaffold21172_Locus_29732_0_58.4_FORK	LG3	39.1109	LcChr2
Locus_32748_Contig1	LG3	39.1109	LcContig182836
scaffold24984_Locus_42685_0_62.0_LINEAR	LG3	39.1109	LcChr2
Locus_4728_Contig1	LG3	40.4386	LcContig693113
C195042_51.0	LG3	40.4386	LcChr2
C195042_51.0	LG3	40.4386	LcChr2
C195042_51.0	LG3	40.4386	LcChr2
Locus_4728_Contig1	LG3	40.4386	LcContig693113
C181550_58.0	LG3	40.4386	LcChr2
scaffold21109_Locus_29570_0_51.7_COMPLEX	LG3	40.4386	LcChr2
C159394_60.0	LG3	41.8151	LcChr2
C159394_60.0	LG3	41.8151	LcChr2
C159394_60.0	LG3	41.8151	LcChr2
C191772_31.0	LG3	42.3102	LcChr2
C191772_31.0	LG3	42.3102	LcChr2
C191772_31.0	LG3	42.3102	LcChr2
C191772_31.0	LG3	42.3102	LcChr2
C191772_31.0	LG3	42.3102	LcChr2
C191772_31.0	LG3	42.3102	LcChr2
C191772_31.0	LG3	42.3102	LcChr2
C191772_31.0	LG3	42.3102	LcChr2
C191772_31.0	LG3	42.3102	LcChr2
C194368_55.0	LG3	43.3857	LcChr2
C175686_51.0	LG3	43.8857	LcChr2
scaffold25535_Locus_50938_0_58.0_LINEAR	LG3	44.8204	LcChr2
scaffold25535_Locus_50938_0_58.0_LINEAR	LG3	44.8204	LcChr2
scaffold7421_Locus_3136_0_59.5_COMPLEX	LG3	46.2914	LcChr2
scaffold7421_Locus_3136_0_59.5_COMPLEX	LG3	46.2914	LcChr2
Locus_542_Contig1	LG3	46.2914	LcChr2
Locus_542_Contig1	LG3	46.2914	LcChr2
Locus_542_Contig1	LG3	46.2914	LcChr2
C199490_57.0	LG3	46.8069	LcChr2
C199490_57.0	LG3	46.8069	LcChr2
C199490_57.0	LG3	46.8069	LcChr2
C199490_57.0	LG3	46.8069	LcChr2
scaffold24080_Locus_38331_1_60.2_FORK	LG3	46.8069	LcContig110305
scaffold24080_Locus_38331_1_60.2_FORK	LG3	46.8069	LcContig110305
scaffold24080_Locus_38331_1_60.2_FORK	LG3	46.8069	LcContig110305
scaffold24080_Locus_38331_1_60.2_FORK	LG3	46.8069	LcContig110305
scaffold24080_Locus_38331_1_60.2_FORK	LG3	46.8069	LcContig110305
scaffold24080_Locus_38331_1_60.2_FORK	LG3	46.8069	LcContig110305
scaffold24080_Locus_38331_1_60.2_FORK	LG3	46.8069	LcContig110305
scaffold24080_Locus_38331_1_60.2_FORK	LG3	46.8069	LcContig110305
C199366_57.0	LG3	47.2971	LcChr2
C209872_57.0	LG3	47.2971	LcChr2
C209872_57.0	LG3	47.2971	LcChr2
scaffold6102_Locus_2313_0_54.2_COMPLEX	LG3	47.2971	LcChr1
C211430_59.0	LG3	47.2971	LcChr2
C192054_56.0	LG3	47.2971	LcChr2
Locus_20688_Contig1	LG3	47.8126	LcChr2
C193492_54.0	LG3	47.8126	LcChr2
C214822_57.0	LG3	47.8126	LcChr2
scaffold20971_Locus_29169_0_60.2_LINEAR	LG3	48.3126	LcChr2
scaffold20971_Locus_29169_0_60.2_LINEAR	LG3	48.3126	LcChr2
C199344_55.0	LG3	48.3126	LcChr2
C200498_58.0	LG3	48.3126	LcChr2
C200498_58.0	LG3	48.3126	LcChr2
C206314_61.0	LG3	48.3126	LcChr2
C205188_52.0	LG3	48.3126	LcChr2
C205188_52.0	LG3	48.3126	LcChr2
C205188_52.0	LG3	48.3126	LcChr2
Locus_29355_Contig1	LG3	48.3126	LcChr2
C206314_61.0	LG3	48.3126	LcChr2
C206314_61.0	LG3	48.3126	LcChr2
C214610_59.0	LG3	49.2743	LcChr2
C183950_57.0	LG3	49.2743	LcChr2
Locus_17718_Contig1	LG3	49.2743	LcChr2
scaffold2759_Locus_942_1_52.6_COMPLEX	LG3	49.2743	LcChr2
C188246_60.0	LG3	49.2743	LcChr2
C215628_61.0	LG3	50.2948	LcChr2
C177350_54.0	LG3	51.7103	LcChr2
C132262_41.0	LG3	51.7103	LcChr2
scaffold16358_Locus_18570_0_60.0_LINEAR	LG3	52.1957	LcChr2
scaffold16358_Locus_18570_0_60.0_LINEAR	LG3	52.1957	LcChr2
C208076_56.0	LG3	52.1957	LcChr2
scaffold10266_Locus_7328_3_65.3_COMPLEX	LG3	54.1385	LcChr2
scaffold10263_Locus_7328_0_60.0_COMPLEX	LG3	54.1385	LcChr2
scaffold20925_Locus_29043_0_60.8_FORK	LG3	54.1385	LcChr2
C180794_57.0	LG3	54.1385	LcChr2
C215576_60.0	LG3	54.1385	LcChr2
C215576_60.0	LG3	54.1385	LcChr2
C215576_60.0	LG3	54.1385	LcChr2
scaffold11049_Locus_8507_0_61.0_LINEAR	LG3	54.1385	LcChr2
C215956_61.0	LG3	54.1385	LcChr2
scaffold21264_Locus_29938_0_42.4_LINEAR	LG3	54.1385	LcChr2
Locus_18070_Contig1	LG3	54.1385	LcChr2
Locus_18070_Contig1	LG3	54.1385	LcChr2
C211718_61.0	LG3	54.1385	LcChr2
C211718_61.0	LG3	54.1385	LcChr2
C211718_61.0	LG3	54.1385	LcChr2
C213858_59.0	LG3	55.091	LcChr2
C213858_59.0	LG3	55.091	LcChr2
C213858_59.0	LG3	55.091	LcChr2
scaffold17763_Locus_21654_1_59.5_FORK	LG3	55.091	LcChr2
scaffold6804_Locus_2649_1_55.5_COMPLEX	LG3	55.091	LcContig562019
C196326_39.0	LG3	55.091	LcChr2
C196326_39.0	LG3	55.091	LcChr2
C196326_39.0	LG3	55.091	LcChr2
C207276_51.0	LG3	55.591	LcChr2
C210024_58.0	LG3	56.0456	LcChr7
C197294_54.0	LG3	56.0456	LcChr2
C197294_54.0	LG3	56.0456	LcChr2
C197294_54.0	LG3	56.0456	LcChr2
C197294_54.0	LG3	56.0456	LcChr2
C197294_54.0	LG3	56.0456	LcChr2
C197294_54.0	LG3	56.0456	LcChr2
C197294_54.0	LG3	56.0456	LcChr2
C197294_54.0	LG3	56.0456	LcChr2
C210024_58.0	LG3	56.0456	LcChr7
C210024_58.0	LG3	56.0456	LcChr7
C210024_58.0	LG3	56.0456	LcChr7
C210024_58.0	LG3	56.0456	LcChr7
scaffold22636_Locus_33548_0_57.8_LINEAR	LG3	57.0261	LcChr2
C215700_61.0	LG3	59.7761	LcChr1
Locus_221_Contig1	LG3	59.7761	LcContig659143
C176868_60.0	LG3	59.7761	LcContig73770
Locus_221_Contig1	LG3	59.7761	LcContig659143
Locus_221_Contig1	LG3	59.7761	LcContig659143
Locus_221_Contig1	LG3	59.7761	LcContig659143
Locus_221_Contig1	LG3	59.7761	LcContig659143
Locus_221_Contig1	LG3	59.7761	LcContig659143
C176868_60.0	LG3	59.7761	LcContig73770
C176868_60.0	LG3	59.7761	LcContig73770
C176868_60.0	LG3	59.7761	LcContig73770
scaffold7135_Locus_2851_1_57.7_COMPLEX	LG3	59.7761	LcChr2
scaffold7135_Locus_2851_1_57.7_COMPLEX	LG3	59.7761	LcChr2
scaffold7135_Locus_2851_1_57.7_COMPLEX	LG3	59.7761	LcChr2
scaffold7135_Locus_2851_1_57.7_COMPLEX	LG3	59.7761	LcChr2
scaffold7135_Locus_2851_1_57.7_COMPLEX	LG3	59.7761	LcChr2
scaffold7135_Locus_2851_1_57.7_COMPLEX	LG3	59.7761	LcChr2
scaffold7135_Locus_2851_1_57.7_COMPLEX	LG3	59.7761	LcChr2
scaffold7135_Locus_2851_1_57.7_COMPLEX	LG3	59.7761	LcChr2
scaffold7135_Locus_2851_1_57.7_COMPLEX	LG3	59.7761	LcChr2
C212052_58.0	LG3	60.8516	LcChr2
C201820_50.0	LG3	61.3233	LcChr2
scaffold25500_Locus_49384_0_60.0_LINEAR	LG3	63.8254	LcChr2
scaffold25500_Locus_49384_0_60.0_LINEAR	LG3	63.8254	LcChr2
scaffold25500_Locus_49384_0_60.0_LINEAR	LG3	63.8254	LcChr2
C202638_54.0	LG3	63.8254	LcChr2
C202428_59.0	LG3	64.2758	LcChr2
C202428_59.0	LG3	64.2758	LcChr2
C202428_59.0	LG3	64.2758	LcChr2
Locus_27651_Contig1	LG3	64.2758	LcChr2
Locus_27651_Contig1	LG3	64.2758	LcChr2
Locus_27651_Contig1	LG3	64.2758	LcChr2
Locus_27651_Contig1	LG3	64.2758	LcChr2
scaffold5827_Locus_2181_1_57.0_COMPLEX	LG3	66.0157	LcChr2
scaffold5394_Locus_1977_1_58.2_COMPLEX	LG3	66.0157	LcChr2
scaffold5827_Locus_2181_1_57.0_COMPLEX	LG3	66.0157	LcChr2
scaffold5827_Locus_2181_1_57.0_COMPLEX	LG3	66.0157	LcChr2
scaffold5827_Locus_2181_1_57.0_COMPLEX	LG3	66.0157	LcChr2
scaffold5827_Locus_2181_1_57.0_COMPLEX	LG3	66.0157	LcChr2
scaffold5827_Locus_2181_1_57.0_COMPLEX	LG3	66.0157	LcChr2
scaffold5827_Locus_2181_1_57.0_COMPLEX	LG3	66.0157	LcChr2
scaffold5827_Locus_2181_1_57.0_COMPLEX	LG3	66.0157	LcChr2
scaffold5827_Locus_2181_1_57.0_COMPLEX	LG3	66.0157	LcChr2
C181368_49.0	LG3	69.5614	LcChr2
C193654_61.0	LG3	69.9852	LcChr2
C193654_61.0	LG3	70.4019	LcChr2
C193654_61.0	LG3	70.4019	LcChr2
C193654_61.0	LG3	70.4019	LcChr2
C193654_61.0	LG3	70.4019	LcChr2
C193654_61.0	LG3	70.4019	LcChr2
C193654_61.0	LG3	70.4019	LcChr2
C197058_53.0	LG3	71.3194	LcChr2
scaffold24172_Locus_38655_0_54.4_LINEAR	LG3	72.2454	LcChr2
scaffold24172_Locus_38655_0_54.4_LINEAR	LG3	72.2454	LcChr2
scaffold24172_Locus_38655_0_54.4_LINEAR	LG3	72.2454	LcChr2
C174362_52.0	LG3	72.2454	LcContig21647
C174362_52.0	LG3	72.2454	LcContig21647
C174362_52.0	LG3	72.2454	LcContig21647
C211868_61.0	LG3	74.3654	LcChr2
C211868_61.0	LG3	74.3654	LcChr2
C211868_61.0	LG3	74.3654	LcChr2
C211868_61.0	LG3	74.3654	LcChr2
C211868_61.0	LG3	74.3654	LcChr2
C200682_59.0	LG3	76.0902	LcChr2
C200682_59.0	LG3	76.0902	LcChr2
C200682_59.0	LG3	76.0902	LcChr2
C200682_59.0	LG3	76.0902	LcChr2
C209350_49.0	LG3	76.0902	LcChr2
C209350_49.0	LG3	76.0902	LcChr2
C209350_49.0	LG3	76.0902	LcChr2
C198294_56.0	LG3	76.5	LcChr2
C198294_56.0	LG3	76.5	LcChr2
scaffold20945_Locus_29109_0_48.5_LINEAR	LG3	76.5	LcChr2
C210854_43.0	LG3	77.8517	LcContig313227
C210854_43.0	LG3	77.8517	LcContig313227
C210854_43.0	LG3	77.8517	LcContig313227
C210854_43.0	LG3	77.8517	LcContig313227
C212280_58.0	LG3	77.8517	LcContig117064
C212280_58.0	LG3	77.8517	LcContig117064
scaffold21987_Locus_31736_0_56.1_FORK	LG3	80.6584	LcChr2
scaffold21987_Locus_31736_0_56.1_FORK	LG3	80.6584	LcChr2
scaffold21987_Locus_31736_0_56.1_FORK	LG3	80.6584	LcChr2
scaffold2640_Locus_898_0_65.2_COMPLEX	LG3	81.5844	LcContig218099
Locus_2037_Contig1	LG3	82.039	LcChr2
C184470_56.0	LG3	82.502	LcContig592211
C182608_54.0	LG3	82.502	LcChr2
Locus_12055_Contig1	LG3	83.5331	LcChr2
Locus_12055_Contig1	LG3	83.5331	LcChr2
Locus_768_Contig1	LG3	83.5331	LcChr2
Locus_768_Contig1	LG3	83.5331	LcChr2
Locus_768_Contig1	LG3	83.5331	LcChr2
Locus_768_Contig1	LG3	83.5331	LcChr2
Locus_2093_Contig1	LG3	83.5331	LcChr2
Locus_2093_Contig1	LG3	83.5331	LcChr2
Locus_2093_Contig1	LG3	83.5331	LcChr2
Locus_2093_Contig1	LG3	83.5331	LcChr2
Locus_2093_Contig1	LG3	83.5331	LcChr2
Locus_2093_Contig1	LG3	83.5331	LcChr2
Locus_2093_Contig1	LG3	83.5331	LcChr2
scaffold12525_Locus_11052_0_54.3_COMPLEX	LG3	83.5331	LcChr2
scaffold12525_Locus_11052_0_54.3_COMPLEX	LG3	83.5331	LcChr2
scaffold12525_Locus_11052_0_54.3_COMPLEX	LG3	83.5331	LcChr2
C208552_60.0	LG3	83.5331	LcChr2
C208552_60.0	LG3	83.5331	LcChr2
Locus_12055_Contig1	LG3	83.5331	LcChr2
Locus_12055_Contig1	LG3	83.5331	LcChr2
Locus_12055_Contig1	LG3	83.5331	LcChr2
Locus_12055_Contig1	LG3	83.5331	LcChr2
scaffold5968_Locus_2249_1_57.2_BUBBLE	LG4	0	LcContig221159
C212206_57.0	LG4	0.467304	LcContig104935
C212206_57.0	LG4	0.467305	LcContig104935
C212206_57.0	LG4	0.467306	LcContig104935
C212206_57.0	LG4	0.467307	LcContig104935
C212206_57.0	LG4	0.467308	LcContig104935
scaffold19121_Locus_24805_0_49.3_FORK	LG4	0.883986	LcChr4
scaffold19121_Locus_24805_0_49.3_FORK	LG4	0.883987	LcChr4
scaffold19121_Locus_24805_0_49.3_FORK	LG4	0.883988	LcChr4
C197322_57.0	LG4	1.29383	LcContig513387
C197322_57.0	LG4	1.29383	LcContig513387
C197322_57.0	LG4	1.29384	LcContig513387
C197322_57.0	LG4	1.29384	LcContig513387
C197322_57.0	LG4	1.29384	LcContig513387
C215390_61.0	LG4	3.01866	LcContig137
C215390_61.0	LG4	3.01866	LcContig137
C215390_61.0	LG4	3.01866	LcContig137
C215390_61.0	LG4	3.01866	LcContig137
C215390_61.0	LG4	3.01866	LcContig137
C215390_61.0	LG4	3.01867	LcContig137
C215390_61.0	LG4	3.01867	LcContig137
scaffold25315_Locus_45625_0_59.3_LINEAR	LG4	5.99247	LcChr5
scaffold25315_Locus_45625_0_59.3_LINEAR	LG4	5.99247	LcChr5
scaffold25315_Locus_45625_0_59.3_LINEAR	LG4	5.99247	LcChr5
C179202_58.0	LG4	6.97299	LcContig213647
C179202_58.0	LG4	6.97299	LcContig213647
C179202_58.0	LG4	6.97299	LcContig213647
C179202_58.0	LG4	6.97299	LcContig213647
C179202_58.0	LG4	6.97299	LcContig213647
C179202_58.0	LG4	6.97299	LcContig213647
C179202_58.0	LG4	6.97299	LcContig213647
C179202_58.0	LG4	6.97299	LcContig213647
C179202_58.0	LG4	6.973	LcContig213647
C179202_58.0	LG4	6.973	LcContig213647
C203124_60.0	LG4	6.973	LcContig26823
C203124_60.0	LG4	6.973	LcContig26823
C179202_58.0	LG4	6.973	LcContig213647
C179202_58.0	LG4	6.973	LcContig213647
C179202_58.0	LG4	6.973	LcContig213647
Locus_15229_Contig1	LG4	9.72808	LcContig167201
C211012_59.0	LG4	10.6541	LcContig142274
scaffold22119_Locus_32041_0_56.2_LINEAR	LG4	12.1852	LcChr2
scaffold22119_Locus_32041_0_56.2_LINEAR	LG4	12.1852	LcChr2
scaffold15250_Locus_16245_0_55.5_LINEAR	LG4	13.2163	LcChr4
C178574_57.0	LG4	13.2163	LcChr4
scaffold15250_Locus_16245_0_55.5_LINEAR	LG4	13.2163	LcChr4
scaffold515_Locus_175_3_67.4_COMPLEX	LG4	14.2803	LcContig168430
C186050_57.0	LG4	15.2608	LcContig4339
C186050_57.0	LG4	15.2608	LcContig4339
C186050_57.0	LG4	15.2608	LcContig4339
C186050_57.0	LG4	15.2608	LcContig4339
C186050_57.0	LG4	15.2608	LcContig4339
scaffold13323_Locus_12483_0_53.6_FORK	LG4	15.2608	LcContig361050
C200244_53.0	LG4	15.2608	LcContig361050
C200244_53.0	LG4	15.2608	LcContig361050
C200244_53.0	LG4	15.2608	LcContig361050
C187748_58.0	LG4	15.7195	LcContig129823
Locus_9179_Contig1	LG4	15.7195	LcContig77745
Locus_9179_Contig1	LG4	15.7195	LcContig77745
Locus_9179_Contig1	LG4	15.7195	LcContig77745
Locus_9179_Contig1	LG4	15.7195	LcContig77745
Locus_9179_Contig1	LG4	15.7195	LcContig77745
Locus_9179_Contig1	LG4	15.7195	LcContig77745
Locus_9179_Contig1	LG4	15.7195	LcContig77745
C187748_58.0	LG4	15.7195	LcContig129823
C187748_58.0	LG4	15.7195	LcContig129823
scaffold13323_Locus_12483_0_53.6_FORK	LG4	15.7195	LcContig361050
scaffold13323_Locus_12483_0_53.6_FORK	LG4	15.7195	LcContig361050
C200244_53.0	LG4	15.7195	LcContig361050
scaffold3969_Locus_1382_1_47.9_COMPLEX	LG4	16.1825	LcChr4
scaffold3969_Locus_1382_1_47.9_COMPLEX	LG4	16.1825	LcChr4
scaffold3969_Locus_1382_1_47.9_COMPLEX	LG4	16.1825	LcChr4
scaffold3969_Locus_1382_1_47.9_COMPLEX	LG4	16.1825	LcChr4
Locus_28453_Contig1	LG4	17.9851	LcChr4
Locus_28453_Contig1	LG4	17.9851	LcChr4
C212962_53.0	LG4	18.9376	LcChr4
C207062_59.0	LG4	19.4184	LcContig72491
C207062_59.0	LG4	19.4184	LcContig72491
C214626_60.0	LG4	20.4938	LcContig243022
Locus_1713_Contig1	LG4	20.4938	LcContig4944
Locus_1713_Contig1	LG4	20.4938	LcContig4944
scaffold12058_Locus_10188_0_60.7_FORK	LG4	20.4938	LcContig4944
scaffold12058_Locus_10188_0_60.7_FORK	LG4	20.4938	LcContig4944
scaffold12058_Locus_10188_0_60.7_FORK	LG4	20.4938	LcContig4944
scaffold12058_Locus_10188_0_60.7_FORK	LG4	20.4938	LcContig4944
C175232_46.0	LG4	21.5578	LcChr4
C175232_46.0	LG4	21.5578	LcChr4
C175232_46.0	LG4	21.5578	LcChr4
C175232_46.0	LG4	21.5578	LcChr4
Locus_6560_Contig1	LG4	23.1713	LcChr4
Locus_6560_Contig1	LG4	23.1713	LcChr4
Locus_6560_Contig1	LG4	23.1713	LcChr4
Locus_6560_Contig1	LG4	23.1713	LcChr4
Locus_6560_Contig1	LG4	23.1713	LcChr4
Locus_6560_Contig1	LG4	23.1713	LcChr4
Locus_6560_Contig1	LG4	23.1713	LcChr4
C214772_61.0	LG4	23.1713	LcContig81073
C214772_61.0	LG4	23.1713	LcContig81073
C214772_61.0	LG4	23.1713	LcContig81073
Locus_6560_Contig1	LG4	23.1713	LcChr4
Locus_6560_Contig1	LG4	23.1713	LcChr4
Locus_6560_Contig1	LG4	23.1713	LcChr4
Locus_6560_Contig1	LG4	23.1713	LcChr4
C214772_61.0	LG4	23.1713	LcContig81073
C214772_61.0	LG4	23.1713	LcContig81073
Locus_6560_Contig1	LG4	23.1713	LcChr4
scaffold8203_Locus_4265_0_47.6_BUBBLE	LG4	23.1713	LcContig508457
Locus_6560_Contig1	LG4	23.1713	LcChr4
Locus_6560_Contig1	LG4	23.1713	LcChr4
scaffold8203_Locus_4265_0_47.6_BUBBLE	LG4	23.1713	LcContig508457
scaffold8203_Locus_4265_0_47.6_BUBBLE	LG4	23.1713	LcContig508457
C205414_58.0	LG4	23.709	LcChr4
C215086_59.0	LG4	25.5967	LcContig5973
C215086_59.0	LG4	25.5967	LcContig5973
C215086_59.0	LG4	25.5967	LcContig5973
C181700_54.0	LG4	25.5967	LcChr4
C181700_54.0	LG4	25.5967	LcChr4
C181700_54.0	LG4	25.5967	LcChr4
C181700_54.0	LG4	25.5967	LcChr4
scaffold10158_Locus_7178_1_54.0_BUBBLE	LG4	26.0431	LcChr4
C209926_58.0	LG4	28.3174	LcChr4
C209926_58.0	LG4	28.3174	LcChr4
C209926_58.0	LG4	28.3174	LcChr4
C209926_58.0	LG4	28.3174	LcChr4
C209926_58.0	LG4	28.3174	LcChr4
scaffold14751_Locus_15251_0_54.1_COMPLEX	LG4	29.2791	LcContig922959
scaffold14751_Locus_15251_0_54.1_COMPLEX	LG4	29.2791	LcContig922959
C182146_52.0	LG4	29.2791	LcChr4
C200900_57.0	LG4	29.2791	LcContig56101
C207672_55.0	LG4	29.2791	LcContig807361
C207672_55.0	LG4	29.2791	LcContig807361
C207672_55.0	LG4	29.2791	LcContig807361
scaffold25524_Locus_50156_0_60.1_LINEAR	LG4	29.7553	LcChr4
scaffold25524_Locus_50156_0_60.1_LINEAR	LG4	29.7553	LcChr4
C199704_56.0	LG4	29.7553	LcChr4
C199704_56.0	LG4	29.7553	LcChr4
C202072_60.0	LG4	29.7553	LcChr4
scaffold25048_Locus_43142_0_57.6_LINEAR	LG4	29.7553	LcChr4
scaffold25048_Locus_43142_0_57.6_LINEAR	LG4	29.7553	LcChr4
scaffold25048_Locus_43142_0_57.6_LINEAR	LG4	29.7553	LcChr4
scaffold25048_Locus_43142_0_57.6_LINEAR	LG4	29.7553	LcChr4
C199704_56.0	LG4	29.7553	LcChr4
scaffold25048_Locus_43142_0_57.6_LINEAR	LG4	29.7553	LcChr4
C197490_59.0	LG4	30.6645	LcContig354660
C197490_59.0	LG4	30.6645	LcContig354660
C197490_59.0	LG4	30.6645	LcContig354660
C197490_59.0	LG4	30.6645	LcContig354660
C198964_60.0	LG4	31.1595	LcChr4
Locus_9520_Contig1	LG4	31.1595	LcChr4
Locus_9520_Contig1	LG4	31.1595	LcChr4
Locus_9520_Contig1	LG4	31.1595	LcChr4
Locus_9520_Contig1	LG4	31.1595	LcChr4
scaffold17266_Locus_20518_0_59.6_LINEAR	LG4	31.1596	LcChr4
C178924_58.0	LG4	31.1596	LcContig437900
C210484_58.0	LG4	31.1596	LcChr4
C213884_57.0	LG4	31.1596	LcContig128628
C213884_57.0	LG4	31.1596	LcContig128628
Locus_9520_Contig1	LG4	31.1596	LcChr4
Locus_9520_Contig1	LG4	31.1596	LcChr4
C192766_60.0	LG4	31.645	LcContig95344
C172230_63.0	LG4	32.0617	LcChr4
C179988_62.0	LG4	32.0617	LcChr4
C179988_62.0	LG4	32.0617	LcChr4
C172230_63.0	LG4	32.0617	LcChr4
C172230_63.0	LG4	32.0617	LcChr4
C107934_34.0	LG4	32.0617	LcChr4
Locus_871_Contig1	LG4	32.0617	LcContig89577
Locus_871_Contig1	LG4	32.0617	LcContig89577
C191240_57.0	LG4	32.0617	LcContig3267
C191240_57.0	LG4	32.0617	LcContig3267
C168314_60.0	LG4	32.0617	LcContig3267
C168314_60.0	LG4	32.0617	LcContig3267
Locus_765_Contig1	LG4	32.4784	LcChr4
C210992_54.0	LG4	35.7851	LcChr4
scaffold24275_Locus_39169_0_56.2_LINEAR	LG4	36.2568	LcChr4
scaffold24275_Locus_39169_0_56.2_LINEAR	LG4	36.2568	LcChr4
scaffold24275_Locus_39169_0_56.2_LINEAR	LG4	36.2568	LcChr4
scaffold24275_Locus_39169_0_56.2_LINEAR	LG4	36.2568	LcChr4
scaffold24275_Locus_39169_0_56.2_LINEAR	LG4	36.2568	LcChr4
Locus_756_Contig1	LG4	36.7831	LcChr4
Locus_756_Contig1	LG4	36.7831	LcChr4
C215320_54.0	LG4	36.7831	LcChr4
C212734_62.0	LG4	37.2548	LcChr4
C212734_62.0	LG4	37.2548	LcChr4
C204764_60.0	LG4	39.1075	LcChr4
scaffold5553_Locus_2054_0_47.2_COMPLEX	LG4	39.1075	LcChr4
scaffold5553_Locus_2054_0_47.2_COMPLEX	LG4	39.1075	LcChr4
C204764_60.0	LG4	39.1075	LcChr4
Locus_144_Contig1	LG4	39.554	LcChr4
Locus_144_Contig1	LG4	39.554	LcChr4
Locus_144_Contig1	LG4	39.554	LcChr4
Locus_144_Contig1	LG4	39.554	LcChr4
Locus_144_Contig1	LG4	39.554	LcChr4
Locus_144_Contig1	LG4	39.554	LcChr4
Locus_144_Contig1	LG4	39.554	LcChr4
Locus_144_Contig1	LG4	39.554	LcChr4
Locus_144_Contig1	LG4	39.554	LcChr4
Locus_144_Contig1	LG4	39.554	LcChr4
Locus_144_Contig1	LG4	39.554	LcChr4
Locus_144_Contig1	LG4	39.554	LcChr4
Locus_144_Contig1	LG4	39.554	LcChr4
Locus_144_Contig1	LG4	39.554	LcChr4
scaffold5564_Locus_2059_1_56.4_COMPLEX	LG4	39.554	LcChr4
scaffold5554_Locus_2054_1_53.6_COMPLEX	LG4	39.554	LcChr4
scaffold5564_Locus_2059_1_56.4_COMPLEX	LG4	39.554	LcChr4
C204082_50.0	LG4	39.554	LcChr4
C204082_50.0	LG4	39.554	LcChr4
Locus_29756_Contig1	LG4	39.554	LcChr4
scaffold9743_Locus_6513_0_54.6_COMPLEX	LG4	39.554	LcChr4
C188628_60.0	LG4	40.8587	LcChr4
C175966_53.0	LG4	41.7762	LcChr4
C175966_53.0	LG4	41.7762	LcChr4
scaffold22977_Locus_34540_0_56.2_LINEAR	LG4	41.7762	LcChr1
C180352_52.0	LG4	41.7762	LcChr4
C180352_52.0	LG4	41.7762	LcChr4
C192680_50.0	LG4	42.2435	LcChr4
C192680_50.0	LG4	42.2435	LcChr4
C192680_50.0	LG4	42.2435	LcChr4
scaffold25380_Locus_46519_0_61.0_LINEAR	LG4	43.224	LcChr4
C193928_57.0	LG4	43.224	LcChr4
C207704_52.0	LG4	43.224	LcChr4
scaffold6679_Locus_2585_1_41.8_COMPLEX	LG4	43.224	LcChr4
scaffold6679_Locus_2585_1_41.8_COMPLEX	LG4	43.224	LcChr4
scaffold6679_Locus_2585_1_41.8_COMPLEX	LG4	43.224	LcChr4
scaffold6679_Locus_2585_1_41.8_COMPLEX	LG4	43.224	LcChr4
scaffold6679_Locus_2585_1_41.8_COMPLEX	LG4	43.224	LcChr4
C208842_56.0	LG4	43.224	LcChr4
C208842_56.0	LG4	43.224	LcChr4
C208842_56.0	LG4	43.224	LcChr4
scaffold22230_Locus_32345_0_62.2_COMPLEX	LG4	43.7142	LcChr4
scaffold22230_Locus_32345_0_62.2_COMPLEX	LG4	43.7142	LcChr4
C213630_58.0	LG4	45.1998	LcChr4
C212016_57.0	LG4	45.1998	LcChr4
C212016_57.0	LG4	45.1998	LcChr4
C212016_57.0	LG4	45.1998	LcChr4
C212016_57.0	LG4	45.1998	LcChr4
C216266_51.0	LG4	45.1998	LcChr4
C216266_51.0	LG4	45.1998	LcChr4
scaffold16062_Locus_17955_0_13.4_LINEAR	LG4	45.1998	LcChr2_scaffold575
scaffold5774_Locus_2153_0_55.3_COMPLEX	LG4	45.6853	LcChr4
scaffold4023_Locus_1406_0_54.7_COMPLEX	LG4	46.6854	LcChr4
scaffold4023_Locus_1406_0_54.7_COMPLEX	LG4	46.6854	LcChr4
scaffold4023_Locus_1406_0_54.7_COMPLEX	LG4	46.6854	LcChr4
scaffold4023_Locus_1406_0_54.7_COMPLEX	LG4	46.6854	LcChr4
scaffold15244_Locus_16233_0_45.2_LINEAR	LG4	46.6854	LcChr4
scaffold15244_Locus_16233_0_45.2_LINEAR	LG4	46.6854	LcChr4
scaffold15244_Locus_16233_0_45.2_LINEAR	LG4	46.6854	LcChr4
scaffold15244_Locus_16233_0_45.2_LINEAR	LG4	46.6854	LcChr4
scaffold15244_Locus_16233_0_45.2_LINEAR	LG4	46.6854	LcChr4
scaffold12446_Locus_10920_0_63.0_COMPLEX	LG4	46.6854	LcChr4
scaffold12446_Locus_10920_0_63.0_COMPLEX	LG4	46.6854	LcChr4
scaffold12446_Locus_10920_0_63.0_COMPLEX	LG4	46.6854	LcChr4
C179884_58.0	LG4	47.706	LcChr4
Locus_2331_Contig1	LG4	47.706	LcChr4
Locus_2331_Contig1	LG4	47.706	LcChr4
C189322_59.0	LG4	47.706	LcChr4
C201818_50.0	LG4	48.2111	LcChr4
C158526_55.0	LG4	48.6698	LcChr4_scaffold3586
scaffold22822_Locus_34059_0_37.6_LINEAR	LG4	48.6698	LcChr4
C175826_53.0	LG4	48.6698	LcChr4
C175826_53.0	LG4	48.6698	LcChr4
C175826_53.0	LG4	48.6698	LcChr4
C175826_53.0	LG4	48.6698	LcChr4
C200962_54.0	LG4	49.5708	LcChr4
C195214_59.0	LG4	49.5708	LcChr1
C195214_59.0	LG4	49.5708	LcChr1
C195214_59.0	LG4	49.5708	LcChr1
C195214_59.0	LG4	49.5708	LcChr1
C195214_59.0	LG4	49.5708	LcChr1
C195214_59.0	LG4	49.5708	LcChr1
C195214_59.0	LG4	49.5708	LcChr1
C195214_59.0	LG4	49.5708	LcChr1
C195214_59.0	LG4	49.5708	LcChr1
C211096_60.0	LG4	49.5708	LcChr4
scaffold7362_Locus_3078_0_59.8_COMPLEX	LG4	49.5708	LcChr4
C211096_60.0	LG4	49.5708	LcChr4
C203660_57.0	LG4	49.5708	LcChr4
C203660_57.0	LG4	49.5708	LcChr4
scaffold24697_Locus_41020_0_56.6_LINEAR	LG4	49.5708	LcChr4
scaffold24697_Locus_41020_0_56.6_LINEAR	LG4	49.5708	LcChr4
scaffold24697_Locus_41020_0_56.6_LINEAR	LG4	49.5708	LcChr4
scaffold24697_Locus_41020_0_56.6_LINEAR	LG4	49.5708	LcChr4
scaffold24697_Locus_41020_0_56.6_LINEAR	LG4	49.5708	LcChr4
scaffold24697_Locus_41020_0_56.6_LINEAR	LG4	49.5708	LcChr4
scaffold12471_Locus_10962_0_58.1_COMPLEX	LG4	49.5708	LcContig690043
C205490_55.0	LG4	49.5708	LcChr4
scaffold12471_Locus_10962_0_58.1_COMPLEX	LG4	49.5708	LcContig690043
scaffold12471_Locus_10962_0_58.1_COMPLEX	LG4	49.5708	LcContig690043
scaffold12471_Locus_10962_0_58.1_COMPLEX	LG4	49.5708	LcContig690043
scaffold12471_Locus_10962_0_58.1_COMPLEX	LG4	49.5708	LcContig690043
C211096_60.0	LG4	49.5708	LcChr4
C211096_60.0	LG4	49.5708	LcChr4
C200962_54.0	LG4	49.5708	LcChr4
C200962_54.0	LG4	49.5708	LcChr4
C200962_54.0	LG4	49.5708	LcChr4
C215146_51.0	LG4	49.5708	LcContig171171
C215146_51.0	LG4	49.5708	LcContig171171
C215146_51.0	LG4	49.5708	LcContig171171
C215146_51.0	LG4	49.5708	LcContig171171
C215146_51.0	LG4	49.5708	LcContig171171
C211096_60.0	LG4	49.5708	LcChr4
C211096_60.0	LG4	49.5708	LcChr4
C211096_60.0	LG4	49.5708	LcChr4
C214826_61.0	LG4	50.0173	LcChr7
C214826_61.0	LG4	50.0173	LcChr7
C208458_55.0	LG4	50.0173	LcChr4
C200962_54.0	LG4	50.0173	LcChr4
C200962_54.0	LG4	50.0173	LcChr4
C200962_54.0	LG4	50.0173	LcChr4
C200962_54.0	LG4	50.0173	LcChr4
C213618_60.0	LG4	50.8946	LcChr4
C213618_60.0	LG4	50.8946	LcChr4
C215996_60.0	LG4	51.345	LcContig193519
C215996_60.0	LG4	51.345	LcContig193519
C202786_60.0	LG4	51.345	LcChr4
C198950_60.0	LG4	51.345	LcChr4
C198950_60.0	LG4	51.345	LcChr4
C198950_60.0	LG4	51.345	LcChr4
C198950_60.0	LG4	51.345	LcChr4
C198950_60.0	LG4	51.345	LcChr4
C194036_60.0	LG4	52.7605	LcChr4
scaffold2885_Locus_990_0_58.0_COMPLEX	LG4	52.7605	LcChr4
scaffold14708_Locus_15163_0_52.9_LINEAR	LG4	53.2192	LcChr4
scaffold14708_Locus_15163_0_52.9_LINEAR	LG4	53.2192	LcChr4
scaffold21828_Locus_31365_0_55.7_LINEAR	LG4	53.2192	LcChr4
scaffold21828_Locus_31365_0_55.7_LINEAR	LG4	53.2192	LcChr4
scaffold21828_Locus_31365_0_55.7_LINEAR	LG4	53.2192	LcChr4
scaffold21828_Locus_31365_0_55.7_LINEAR	LG4	53.2192	LcChr4
scaffold21828_Locus_31365_0_55.7_LINEAR	LG4	53.2192	LcChr4
scaffold3739_Locus_1301_0_57.5_COMPLEX	LG4	53.2192	LcChr4
scaffold21828_Locus_31365_0_55.7_LINEAR	LG4	53.2192	LcChr4
scaffold21828_Locus_31365_0_55.7_LINEAR	LG4	53.2192	LcChr4
scaffold21828_Locus_31365_0_55.7_LINEAR	LG4	53.2192	LcChr4
scaffold21828_Locus_31365_0_55.7_LINEAR	LG4	53.2192	LcChr4
scaffold21828_Locus_31365_0_55.7_LINEAR	LG4	53.2192	LcChr4
scaffold21828_Locus_31365_0_55.7_LINEAR	LG4	53.2193	LcChr4
C201838_57.0	LG4	53.2193	LcChr4
C201838_57.0	LG4	53.2193	LcChr4
Locus_407_Contig1	LG4	53.2193	LcChr4
scaffold21395_Locus_30246_0_59.3_LINEAR	LG4	53.7295	LcChr4
C214470_61.0	LG4	54.245	LcChr4
scaffold6245_Locus_2389_1_53.7_COMPLEX	LG4	55.1625	LcChr4
scaffold20552_Locus_28076_0_51.2_LINEAR	LG4	55.1625	LcChr4
scaffold5459_Locus_2008_1_56.8_BUBBLE	LG4	55.1625	LcChr4
scaffold5459_Locus_2008_1_56.8_BUBBLE	LG4	55.1625	LcChr4
C187314_53.0	LG4	55.569	LcChr4
C175144_61.0	LG4	55.569	LcChr4
C175144_61.0	LG4	55.569	LcChr4
C187314_53.0	LG4	55.569	LcChr4
C196286_52.0	LG4	55.569	LcChr4
C196286_52.0	LG4	55.569	LcChr4
C196286_52.0	LG4	55.569	LcChr4
scaffold20759_Locus_28652_1_44.5_COMPLEX	LG4	56.8737	LcChr4
Locus_1486_Contig1	LG4	58.6601	LcChr4
C212658_56.0	LG4	59.0839	LcChr4
scaffold13150_Locus_12154_0_58.7_LINEAR	LG4	59.5469	LcChr4
scaffold23000_Locus_34618_0_58.9_LINEAR	LG4	59.5469	LcChr4
C210488_57.0	LG4	59.5469	LcChr4
C210488_57.0	LG4	59.5469	LcChr4
C215884_60.0	LG4	59.5469	LcChr4
C197654_62.0	LG4	59.5469	LcChr4
Locus_940_Contig1	LG4	60.5674	LcChr4
C185874_55.0	LG4	60.5674	LcChr4
C190724_54.0	LG4	61.0529	LcChr4
C190724_54.0	LG4	61.0529	LcChr4
C172728_57.0	LG4	61.4993	LcChr4
C172728_57.0	LG4	61.4993	LcChr4
C206266_60.0	LG4	61.4993	LcChr4
C206266_60.0	LG4	61.4993	LcChr4
C206266_60.0	LG4	61.4993	LcChr4
Locus_20288_Contig1	LG4	61.9231	LcChr4
Locus_20288_Contig1	LG4	61.9231	LcChr4
Locus_20288_Contig1	LG4	61.9231	LcChr4
Locus_20288_Contig1	LG4	61.9231	LcChr4
scaffold19388_Locus_25372_0_29.7_LINEAR	LG4	62.3432	LcChr4
scaffold19388_Locus_25372_0_29.7_LINEAR	LG4	62.3432	LcChr4
scaffold19388_Locus_25372_0_29.7_LINEAR	LG4	62.3432	LcChr4
scaffold19388_Locus_25372_0_29.7_LINEAR	LG4	62.3432	LcChr4
scaffold19388_Locus_25372_0_29.7_LINEAR	LG4	62.3432	LcChr4
scaffold19388_Locus_25372_0_29.7_LINEAR	LG4	62.3432	LcChr4
C193254_59.0	LG4	62.3432	LcContig149476
C193254_59.0	LG4	62.3432	LcContig149476
C193254_59.0	LG4	62.3432	LcContig149476
C193254_59.0	LG4	62.3432	LcContig149476
Locus_1422_Contig1	LG4	62.7857	LcChr4
scaffold4380_Locus_1553_1_56.4_COMPLEX	LG4	63.2445	LcChr4
C201416_47.0	LG4	63.2445	LcChr1
C201416_47.0	LG4	63.2445	LcChr1
C171726_50.0	LG4	64.1374	LcChr4
Locus_2398_Contig1	LG4	64.9708	LcChr4
C206194_58.0	LG4	64.9708	LcChr4
Locus_2398_Contig1	LG4	64.9708	LcChr4
Locus_2398_Contig1	LG4	64.9708	LcChr4
Locus_2398_Contig1	LG4	64.9708	LcChr4
C196120_50.0	LG4	70.8007	LcChr4
C196120_50.0	LG4	70.8007	LcChr4
C169118_50.0	LG4	70.8007	LcChr4
C169118_50.0	LG4	70.8007	LcChr4
C207818_61.0	LG4	72.9206	LcChr4
C207818_61.0	LG4	72.9206	LcChr4
C207818_61.0	LG4	72.9206	LcChr4
C207818_61.0	LG4	72.9206	LcChr4
C207818_61.0	LG4	72.9206	LcChr4
C207818_61.0	LG4	72.9206	LcChr4
C207818_61.0	LG4	72.9206	LcChr4
C207818_61.0	LG4	72.9206	LcChr4
C207818_61.0	LG4	72.9206	LcChr4
C182652_60.0	LG4	73.3968	LcChr4
C194526_56.0	LG4	74.387	LcChr4
C194526_56.0	LG4	74.387	LcChr4
C170200_57.0	LG4	74.387	LcChr4
C194526_56.0	LG4	74.387	LcChr4
C194526_56.0	LG4	74.387	LcChr4
scaffold24847_Locus_41925_0_58.6_LINEAR	LG4	75.3395	LcChr4
C197842_60.0	LG4	75.7983	LcChr4
C197842_60.0	LG4	75.7983	LcChr4
C197842_60.0	LG4	75.7983	LcChr4
C197842_60.0	LG4	75.7983	LcChr4
C197842_60.0	LG4	75.7983	LcChr4
C197842_60.0	LG4	75.7983	LcChr4
C197842_60.0	LG4	75.7983	LcChr4
C197842_60.0	LG4	75.7983	LcChr4
C197842_60.0	LG4	75.7983	LcChr4
C197842_60.0	LG4	75.7983	LcChr4
C172734_59.0	LG4	75.7983	LcChr4
scaffold24847_Locus_41925_0_58.6_LINEAR	LG4	75.7983	LcChr4
C172734_59.0	LG4	75.7983	LcChr4
scaffold24847_Locus_41925_0_58.6_LINEAR	LG4	75.7983	LcChr4
scaffold24847_Locus_41925_0_58.6_LINEAR	LG4	75.7983	LcChr4
scaffold24847_Locus_41925_0_58.6_LINEAR	LG4	75.7983	LcChr4
C214468_61.0	LG4	77.686	LcChr4
C214468_61.0	LG4	77.686	LcChr4
C215184_59.0	LG4	78.1405	LcChr4
C215184_59.0	LG4	78.1405	LcChr4
C215184_59.0	LG4	78.1405	LcChr4
C215184_59.0	LG4	78.1405	LcChr4
C215184_59.0	LG4	78.1405	LcChr4
scaffold15256_Locus_16262_1_54.1_FORK	LG4	78.1405	LcChr4
scaffold15256_Locus_16262_1_54.1_FORK	LG4	78.1405	LcChr4
scaffold15430_Locus_16627_1_54.3_FORK	LG4	79.0841	LcChr4
C206640_56.0	LG4	79.0841	LcChr4
C206640_56.0	LG4	79.0841	LcChr4
C206640_56.0	LG4	79.0841	LcChr4
C206640_56.0	LG4	79.0841	LcChr4
C206640_56.0	LG4	79.0841	LcChr4
C191656_57.0	LG4	80.0551	LcChr4
C191656_57.0	LG4	80.0551	LcChr4
C191656_57.0	LG4	80.0551	LcChr4
C191656_57.0	LG4	80.0551	LcChr4
C191656_57.0	LG4	80.0551	LcChr4
C191656_57.0	LG4	80.0551	LcChr4
C210784_62.0	LG4	80.0551	LcChr4
C210784_62.0	LG4	80.0551	LcChr4
C210784_62.0	LG4	80.0551	LcChr4
C210784_62.0	LG4	80.0551	LcChr4
C210784_62.0	LG4	80.0551	LcChr4
C210784_62.0	LG4	80.0551	LcChr4
C215512_52.0	LG4	80.5759	LcChr4
C144708_55.0	LG4	81.5862	LcChr4
C192242_58.0	LG4	81.5862	LcChr4
Locus_2441_Contig1	LG4	82.4483	LcChr4
Locus_2441_Contig1	LG4	82.4483	LcChr4
Locus_2441_Contig1	LG4	82.4483	LcChr4
Locus_2441_Contig1	LG4	82.4483	LcChr4
Locus_2441_Contig1	LG4	82.4483	LcChr4
Locus_2441_Contig1	LG4	82.4483	LcChr4
Locus_2441_Contig1	LG4	82.4483	LcChr4
Locus_2441_Contig1	LG4	82.4483	LcChr4
Locus_2441_Contig1	LG4	82.4483	LcChr4
Locus_2441_Contig1	LG4	82.4483	LcChr4
Locus_2441_Contig1	LG4	82.4483	LcChr4
scaffold21725_Locus_31098_0_17.9_LINEAR	LG4	82.4483	LcChr4
scaffold2541_Locus_861_0_53.4_COMPLEX	LG4	86.0911	LcChr4
scaffold22710_Locus_33736_1_49.0_BUBBLE	LG4	88.8978	LcChr4
scaffold22710_Locus_33736_1_49.0_BUBBLE	LG4	88.8978	LcChr4
scaffold22710_Locus_33736_1_49.0_BUBBLE	LG4	88.8978	LcChr4
scaffold22710_Locus_33736_1_49.0_BUBBLE	LG4	88.8978	LcChr4
scaffold22710_Locus_33736_1_49.0_BUBBLE	LG4	88.8978	LcChr4
scaffold22710_Locus_33736_1_49.0_BUBBLE	LG4	88.8978	LcChr4
scaffold22710_Locus_33736_1_49.0_BUBBLE	LG4	88.8978	LcChr4
scaffold22710_Locus_33736_1_49.0_BUBBLE	LG4	88.8978	LcChr4
scaffold22540_Locus_33290_0_57.1_LINEAR	LG4	90.3834	LcChr4
Locus_23799_Contig1	LG4	90.8834	LcChr4
Locus_23799_Contig1	LG4	90.8834	LcChr4
C199356_58.0	LG4	91.8094	LcChr4
C199356_58.0	LG4	91.8095	LcChr4
C199356_58.0	LG4	91.8095	LcChr4
scaffold14463_Locus_14713_0_52.2_FORK	LG5	0	LcChr6
scaffold14463_Locus_14713_0_52.2_FORK	LG5	1e-06	LcChr6
C202194_32.0	LG5	2.50209	LcChr6
C182924_61.0	LG5	3.41128	LcContig35288
C182924_61.0	LG5	3.41128	LcContig35288
C206936_61.0	LG5	3.41128	LcChr6
C215260_56.0	LG5	14.3793	LcChr6
C215260_56.0	LG5	14.3793	LcChr6
C215260_56.0	LG5	14.3793	LcChr6
C215260_56.0	LG5	14.3793	LcChr6
C215260_56.0	LG5	14.3793	LcChr6
C215260_56.0	LG5	14.3793	LcChr6
Locus_121_Contig1	LG5	17.4134	LcChr6
Locus_11021_Contig1	LG5	17.8482	LcChr6
Locus_11021_Contig1	LG5	17.8482	LcChr6
Locus_11021_Contig1	LG5	17.8482	LcChr6
Locus_11021_Contig1	LG5	17.8482	LcChr6
C215626_58.0	LG5	17.8482	LcChr6
C215626_58.0	LG5	17.8482	LcChr6
C134088_37.0	LG5	18.2648	LcChr6
Locus_11301_Contig1	LG5	19.6803	LcChr6
Locus_11301_Contig1	LG5	19.6803	LcChr6
Locus_11301_Contig1	LG5	19.6803	LcChr6
C209814_59.0	LG5	19.6803	LcChr6
C205984_57.0	LG5	20.152	LcChr6
C205984_57.0	LG5	20.152	LcChr6
C205984_57.0	LG5	20.152	LcChr6
C205984_57.0	LG5	20.152	LcChr6
C215236_61.0	LG5	20.6571	LcChr6
C215236_61.0	LG5	20.6571	LcChr6
C215236_61.0	LG5	20.6571	LcChr6
C215236_61.0	LG5	20.6571	LcChr6
C215236_61.0	LG5	20.6571	LcChr6
C215236_61.0	LG5	20.6571	LcChr6
C215236_61.0	LG5	20.6571	LcChr6
C215236_61.0	LG5	20.6571	LcChr6
C215236_61.0	LG5	20.6571	LcChr6
scaffold1105_Locus_365_0_51.1_COMPLEX	LG5	21.7809	LcChr6
scaffold1105_Locus_365_0_51.1_COMPLEX	LG5	22.2664	LcChr6
C212320_56.0	LG5	23.9336	LcChr6
C212320_56.0	LG5	23.9336	LcChr6
C176496_59.0	LG5	23.9336	LcChr6
C186524_50.0	LG5	23.9336	LcChr6
C183610_51.0	LG5	23.9336	LcChr6
Locus_2832_Contig1	LG5	29.3309	LcChr6
C210356_59.0	LG5	29.3309	LcChr6
C210356_59.0	LG5	29.3309	LcChr6
C198290_55.0	LG5	29.3309	LcChr6
C198290_55.0	LG5	29.3309	LcChr6
C198290_55.0	LG5	29.3309	LcChr6
C198290_55.0	LG5	29.3309	LcChr6
C198290_55.0	LG5	29.3309	LcChr6
C198290_55.0	LG5	29.3309	LcChr6
C198290_55.0	LG5	29.3309	LcChr6
C198290_55.0	LG5	29.3309	LcChr6
C198290_55.0	LG5	29.3309	LcChr6
C198290_55.0	LG5	29.3309	LcChr6
C198290_55.0	LG5	29.3309	LcChr6
scaffold8143_Locus_4173_1_59.7_FORK	LG5	29.3309	LcChr6
scaffold22436_Locus_32972_0_56.9_LINEAR	LG5	29.3309	LcChr6
scaffold22436_Locus_32972_0_56.9_LINEAR	LG5	29.3309	LcChr6
scaffold22436_Locus_32972_0_56.9_LINEAR	LG5	29.3309	LcChr6
C196248_51.0	LG5	30.6243	LcChr6
scaffold25025_Locus_42964_0_51.1_LINEAR	LG5	30.6243	LcChr6
scaffold25025_Locus_42964_0_51.1_LINEAR	LG5	30.6243	LcChr6
scaffold25025_Locus_42964_0_51.1_LINEAR	LG5	30.6243	LcChr6
scaffold25025_Locus_42964_0_51.1_LINEAR	LG5	30.6243	LcChr6
scaffold25025_Locus_42964_0_51.1_LINEAR	LG5	30.6243	LcChr6
C194748_61.0	LG5	30.6243	LcChr6
C194748_61.0	LG5	30.6243	LcChr6
C194748_61.0	LG5	30.6243	LcChr6
scaffold25379_Locus_46516_0_60.0_LINEAR	LG5	31.048	LcChr6
Locus_25161_Contig1	LG5	32.5047	LcContig98036
Locus_25161_Contig1	LG5	32.5047	LcContig98036
Locus_25161_Contig1	LG5	32.5047	LcContig98036
Locus_25161_Contig1	LG5	32.5047	LcContig98036
Locus_25161_Contig1	LG5	32.5047	LcContig98036
Locus_25161_Contig1	LG5	32.5047	LcContig98036
Locus_231_Contig1	LG5	33.5802	LcChr6
Locus_231_Contig1	LG5	33.5802	LcChr6
C214086_58.0	LG5	34.0957	LcChr6
scaffold17841_Locus_21852_0_58.6_COMPLEX	LG5	35.9657	LcChr6
scaffold17841_Locus_21852_0_58.6_COMPLEX	LG5	35.9657	LcChr6
scaffold17841_Locus_21852_0_58.6_COMPLEX	LG5	35.9657	LcChr6
Locus_2579_Contig1	LG5	36.4465	LcChr7
Locus_2579_Contig1	LG5	36.4465	LcChr7
Locus_2579_Contig1	LG5	36.4465	LcChr7
C169580_57.0	LG5	36.4465	LcContig88817
scaffold10884_Locus_8235_0_58.7_COMPLEX	LG5	36.4465	LcContig244497
scaffold10884_Locus_8235_0_58.7_COMPLEX	LG5	36.4465	LcContig244497
Locus_2579_Contig1	LG5	36.4465	LcChr7
C211580_61.0	LG5	37.4367	LcChr6
C211580_61.0	LG5	37.4367	LcChr6
C211580_61.0	LG5	37.4367	LcChr6
scaffold16422_Locus_18735_0_53.1_FORK	LG5	37.9084	LcContig94402
scaffold16422_Locus_18735_0_53.1_FORK	LG5	37.9084	LcContig94402
scaffold16422_Locus_18735_0_53.1_FORK	LG5	37.9084	LcContig94402
scaffold16422_Locus_18735_0_53.1_FORK	LG5	37.9084	LcContig94402
C183372_58.0	LG5	39.8897	LcChr1
C183372_58.0	LG5	39.8897	LcChr1
C183372_58.0	LG5	39.8897	LcChr1
C210504_61.0	LG5	41.2919	LcChr6
C210504_61.0	LG5	41.2919	LcChr6
Locus_1641_Contig1	LG5	42.6315	LcContig311620
C203968_55.0	LG5	43.0553	LcContig102335
scaffold16225_Locus_18274_0_52.3_FORK	LG5	43.0553	LcContig363792
scaffold16225_Locus_18274_0_52.3_FORK	LG5	43.0553	LcContig363792
C212920_53.0	LG5	43.5182	LcContig16992
C212920_53.0	LG5	43.5182	LcContig16992
C191584_45.0	LG5	43.5182	LcChr6
scaffold24301_Locus_39254_0_61.2_LINEAR	LG5	44.4529	LcChr6
C185856_54.0	LG5	44.4529	LcChr6
scaffold24301_Locus_39254_0_61.2_LINEAR	LG5	44.4529	LcChr6
scaffold24301_Locus_39254_0_61.2_LINEAR	LG5	44.4529	LcChr6
scaffold24301_Locus_39254_0_61.2_LINEAR	LG5	44.4529	LcChr6
scaffold24301_Locus_39254_0_61.2_LINEAR	LG5	44.4529	LcChr6
scaffold24301_Locus_39254_0_61.2_LINEAR	LG5	44.4529	LcChr6
scaffold24301_Locus_39254_0_61.2_LINEAR	LG5	44.4529	LcChr6
scaffold24301_Locus_39254_0_61.2_LINEAR	LG5	44.4529	LcChr6
scaffold24301_Locus_39254_0_61.2_LINEAR	LG5	44.4529	LcChr6
scaffold24301_Locus_39254_0_61.2_LINEAR	LG5	44.4529	LcChr6
scaffold24301_Locus_39254_0_61.2_LINEAR	LG5	44.4529	LcChr6
scaffold24301_Locus_39254_0_61.2_LINEAR	LG5	44.4529	LcChr6
scaffold24301_Locus_39254_0_61.2_LINEAR	LG5	44.4529	LcChr6
scaffold24301_Locus_39254_0_61.2_LINEAR	LG5	44.4529	LcChr6
scaffold24301_Locus_39254_0_61.2_LINEAR	LG5	44.4529	LcChr6
scaffold24301_Locus_39254_0_61.2_LINEAR	LG5	44.4529	LcChr6
Locus_5504_Contig1	LG5	45.3077	LcChr6
Locus_1049_Contig1	LG5	45.3077	LcChr6
C201932_57.0	LG5	45.3077	LcChr6
scaffold12435_Locus_10894_0_55.5_COMPLEX	LG5	45.3077	LcChr6
Locus_5504_Contig1	LG5	45.3077	LcChr6
C205790_60.0	LG5	46.1928	LcChr6
scaffold24929_Locus_42416_0_54.9_LINEAR	LG5	47.102	LcContig8037
Locus_14692_Contig1	LG5	48.028	LcChr6
Locus_14692_Contig1	LG5	48.028	LcChr6
C206104_54.0	LG5	48.028	LcChr6
Locus_10160_Contig1	LG5	48.028	LcContig134805
scaffold25254_Locus_45009_0_60.8_LINEAR	LG5	49.0182	LcChr6
scaffold25254_Locus_45009_0_60.8_LINEAR	LG5	49.0182	LcChr6
scaffold24292_Locus_39223_0_59.5_BUBBLE	LG5	49.0182	LcChr6
C182806_52.0	LG5	49.0182	LcChr6
C187544_54.0	LG5	49.0182	LcChr6
C187544_54.0	LG5	49.0182	LcChr6
C189208_51.0	LG5	49.0182	LcChr6
C189208_51.0	LG5	49.0182	LcChr6
C189208_51.0	LG5	49.0182	LcChr6
C189208_51.0	LG5	49.0182	LcChr6
C182806_52.0	LG5	49.0182	LcChr6
C182806_52.0	LG5	49.0182	LcChr6
C176146_59.0	LG5	49.0182	LcContig84733
C176146_59.0	LG5	49.0183	LcContig84733
C202260_58.0	LG5	49.0183	LcChr6
C202260_58.0	LG5	49.0183	LcChr6
C202260_58.0	LG5	49.0183	LcChr6
C202260_58.0	LG5	49.0183	LcChr6
scaffold2996_Locus_1032_0_60.7_COMPLEX	LG5	49.0183	LcContig516982
scaffold5478_Locus_2019_1_57.2_COMPLEX	LG5	49.5391	LcChr6
scaffold25526_Locus_50243_0_58.6_LINEAR	LG5	50.0442	LcChr6
scaffold25526_Locus_50243_0_58.6_LINEAR	LG5	50.0442	LcChr6
scaffold25526_Locus_50243_0_58.6_LINEAR	LG5	50.0442	LcChr6
scaffold25526_Locus_50243_0_58.6_LINEAR	LG5	50.0442	LcChr6
C194956_58.0	LG5	50.0442	LcChr6
C194956_58.0	LG5	50.0442	LcChr6
C194948_59.0	LG5	51.5009	LcChr6
scaffold11520_Locus_9293_0_58.1_COMPLEX	LG5	51.9473	LcChr6
C216256_61.0	LG5	52.8909	LcChr6
C212824_55.0	LG5	52.8909	LcChr6
scaffold1415_Locus_472_1_52.9_COMPLEX	LG5	54.2801	LcChr6
C198700_61.0	LG5	54.2801	LcChr6
C215306_60.0	LG5	54.2801	LcChr6
C215306_60.0	LG5	54.2801	LcChr6
C215306_60.0	LG5	54.2801	LcChr6
scaffold18402_Locus_23200_0_53.0_FORK	LG5	55.6197	LcChr6
scaffold18402_Locus_23200_0_53.0_FORK	LG5	55.6197	LcChr6
C208262_41.0	LG5	55.6197	LcChr6
C208262_41.0	LG5	55.6197	LcChr6
scaffold13653_Locus_13159_0_49.7_LINEAR	LG5	56.0662	LcChr6
C210726_58.0	LG5	56.0662	LcChr6
Locus_4580_Contig1	LG5	56.5126	LcChr6
C179958_33.0	LG5	56.5126	LcChr6
scaffold8941_Locus_5356_0_35.5_LINEAR	LG5	56.5126	LcChr6
Locus_15402_Contig1	LG5	56.5126	LcChr6
C189294_60.0	LG5	57.0077	LcChr6
scaffold14079_Locus_13985_0_59.2_BUBBLE	LG5	57.0077	LcChr6
C209860_57.0	LG5	57.5027	LcChr6
C199400_53.0	LG5	57.5027	LcChr6
C204620_53.0	LG5	57.5027	LcChr6
C192700_51.0	LG5	57.5027	LcContig6091
C199400_53.0	LG5	57.5027	LcChr6
C199400_53.0	LG5	57.5027	LcChr6
C204620_53.0	LG5	57.5027	LcChr6
C204620_53.0	LG5	57.5027	LcChr6
Locus_1575_Contig1	LG5	58.4288	LcChr6
Locus_1575_Contig1	LG5	58.4288	LcChr6
C212288_60.0	LG5	58.4288	LcChr6
C212288_60.0	LG5	58.4288	LcChr6
scaffold19235_Locus_25052_0_52.5_LINEAR	LG5	58.4288	LcChr6
scaffold5105_Locus_1846_0_48.6_COMPLEX	LG5	58.8713	LcChr6
scaffold5105_Locus_1846_0_48.6_COMPLEX	LG5	58.8713	LcChr6
scaffold5105_Locus_1846_0_48.6_COMPLEX	LG5	58.8713	LcChr6
C200118_53.0	LG5	58.8713	LcChr6
scaffold10307_Locus_7383_0_45.3_LINEAR	LG5	59.8615	LcChr3
scaffold10307_Locus_7383_0_45.3_LINEAR	LG5	59.8615	LcChr3
scaffold10307_Locus_7383_0_45.3_LINEAR	LG5	59.8615	LcChr3
scaffold11754_Locus_9635_1_59.5_FORK	LG5	63.5524	LcChr6
scaffold10242_Locus_7300_0_51.6_FORK	LG5	63.9835	LcChr6
scaffold10242_Locus_7300_0_51.6_FORK	LG5	63.9835	LcChr6
scaffold10242_Locus_7300_0_51.6_FORK	LG5	63.9835	LcChr6
scaffold10242_Locus_7300_0_51.6_FORK	LG5	63.9835	LcChr6
scaffold10242_Locus_7300_0_51.6_FORK	LG5	63.9835	LcChr6
scaffold10242_Locus_7300_0_51.6_FORK	LG5	63.9835	LcChr6
scaffold10242_Locus_7300_0_51.6_FORK	LG5	63.9835	LcChr6
scaffold10242_Locus_7300_0_51.6_FORK	LG5	63.9835	LcChr6
scaffold10242_Locus_7300_0_51.6_FORK	LG5	63.9835	LcChr6
scaffold10242_Locus_7300_0_51.6_FORK	LG5	63.9835	LcChr6
scaffold10242_Locus_7300_0_51.6_FORK	LG5	63.9835	LcChr6
C213846_52.0	LG6	0	LcChr5
C213846_52.0	LG6	1e-06	LcChr5
Locus_78_Contig1	LG6	0.50507	LcChr5
C168680_54.0	LG6	0.505071	LcChr5
C199474_62.0	LG6	1.92054	LcChr5
C199474_62.0	LG6	1.92055	LcChr5
scaffold12264_Locus_10584_0_52.1_LINEAR	LG6	3.19201	LcChr5
scaffold12264_Locus_10584_0_52.1_LINEAR	LG6	3.19201	LcChr5
C209546_60.0	LG6	3.19201	LcChr5
C209546_60.0	LG6	3.19201	LcChr5
C209546_60.0	LG6	3.19201	LcChr5
C209546_60.0	LG6	3.19201	LcChr5
C209546_60.0	LG6	3.19201	LcChr5
C209546_60.0	LG6	3.19201	LcChr5
C209546_60.0	LG6	3.19201	LcChr5
C209546_60.0	LG6	3.19202	LcChr5
C209546_60.0	LG6	3.19202	LcChr5
C209000_56.0	LG6	3.19202	LcChr5
C178194_47.0	LG6	3.63846	LcChr5
Locus_11102_Contig1	LG6	4.6487	LcChr5
scaffold25216_Locus_44698_0_49.5_LINEAR	LG6	4.6487	LcChr5
scaffold25216_Locus_44698_0_49.5_LINEAR	LG6	4.6487	LcChr5
scaffold19838_Locus_26353_0_44.1_LINEAR	LG6	4.6487	LcChr1_scaffold7335
C206280_54.0	LG6	5.13891	LcChr5
C206280_54.0	LG6	5.13892	LcChr5
C206280_54.0	LG6	5.13892	LcChr5
C184098_57.0	LG6	5.13892	LcChr5
C206280_54.0	LG6	5.13892	LcChr5
scaffold20070_Locus_26951_0_53.8_LINEAR	LG6	5.58938	LcChr5
scaffold20070_Locus_26951_0_53.8_LINEAR	LG6	5.58938	LcChr5
scaffold17569_Locus_21151_0_48.0_LINEAR	LG6	6.01312	LcChr5
scaffold17569_Locus_21151_0_48.0_LINEAR	LG6	6.01312	LcChr5
scaffold17569_Locus_21151_0_48.0_LINEAR	LG6	6.01312	LcChr5
scaffold17569_Locus_21151_0_48.0_LINEAR	LG6	6.01313	LcChr5
scaffold17569_Locus_21151_0_48.0_LINEAR	LG6	6.01313	LcChr5
scaffold17569_Locus_21151_0_48.0_LINEAR	LG6	6.01313	LcChr5
C210136_57.0	LG6	6.47186	LcChr5
C210136_57.0	LG6	6.47186	LcChr5
C210136_57.0	LG6	6.47186	LcChr5
C210136_57.0	LG6	6.47186	LcChr5
scaffold20453_Locus_27859_1_60.5_COMPLEX	LG6	8.34189	LcChr5
scaffold5252_Locus_1908_0_56.3_BUBBLE	LG6	12.6797	LcChr5
C212246_60.0	LG6	13.1384	LcChr5
C212246_60.0	LG6	13.1384	LcChr5
C212246_60.0	LG6	13.1384	LcChr5
C212246_60.0	LG6	13.1384	LcChr5
C212246_60.0	LG6	13.1384	LcChr5
C212246_60.0	LG6	13.1384	LcChr5
C212246_60.0	LG6	13.1384	LcChr5
C215660_61.0	LG6	15.7958	LcChr5
C215660_61.0	LG6	15.7958	LcChr5
C215660_61.0	LG6	15.7958	LcChr5
C215660_61.0	LG6	15.7958	LcChr5
C215472_56.0	LG6	18.9249	LcChr5
C209312_53.0	LG6	19.8178	LcChr5
C164758_50.0	LG6	19.8178	LcChr5
C209312_53.0	LG6	19.8178	LcChr5
C164758_50.0	LG6	19.8178	LcChr5
C210352_51.0	LG6	20.2724	LcChr5
C210352_51.0	LG6	20.2724	LcChr5
C210352_51.0	LG6	20.2724	LcChr5
C210352_51.0	LG6	20.2724	LcChr5
scaffold3470_Locus_1208_0_57.5_COMPLEX	LG6	20.2724	LcChr5
scaffold3470_Locus_1208_0_57.5_COMPLEX	LG6	20.2724	LcChr5
scaffold3470_Locus_1208_0_57.5_COMPLEX	LG6	20.2724	LcChr5
C213904_51.0	LG6	21.7291	LcChr5
C213904_51.0	LG6	21.7291	LcChr5
C213904_51.0	LG6	21.7291	LcChr5
C213904_51.0	LG6	21.7291	LcChr5
C213904_51.0	LG6	21.7291	LcChr5
C213904_51.0	LG6	21.7291	LcChr5
C213904_51.0	LG6	21.7291	LcChr5
C213904_51.0	LG6	21.7291	LcChr5
C214120_59.0	LG6	22.6551	LcChr5
C214120_59.0	LG6	22.6551	LcChr5
C214120_59.0	LG6	22.6551	LcChr5
C214120_59.0	LG6	22.6551	LcChr5
C214120_59.0	LG6	22.6551	LcChr5
C214120_59.0	LG6	22.6551	LcChr5
C214120_59.0	LG6	22.6551	LcChr5
C214120_59.0	LG6	22.6551	LcChr5
C214120_59.0	LG6	22.6551	LcChr5
C214120_59.0	LG6	22.6551	LcChr5
C214120_59.0	LG6	22.6551	LcChr5
C214120_59.0	LG6	22.6551	LcChr5
scaffold12394_Locus_10806_1_53.3_FORK	LG6	23.0899	LcChr5
Locus_4462_Contig1	LG6	24.4539	LcChr5
scaffold16622_Locus_19133_0_60.7_COMPLEX	LG6	25.7935	LcContig190853
scaffold16622_Locus_19133_0_60.7_COMPLEX	LG6	25.7935	LcContig190853
scaffold16622_Locus_19133_0_60.7_COMPLEX	LG6	25.7935	LcContig190853
scaffold16622_Locus_19133_0_60.7_COMPLEX	LG6	25.7935	LcContig190853
scaffold16622_Locus_19133_0_60.7_COMPLEX	LG6	25.7935	LcContig190853
scaffold10820_Locus_8150_0_61.2_FORK	LG6	25.7935	LcChr5
C194228_51.0	LG6	27.3091	LcChr5
C194228_51.0	LG6	27.3091	LcChr5
C194228_51.0	LG6	27.3091	LcChr5
scaffold25441_Locus_47774_0_56.2_LINEAR	LG6	28.9581	LcChr1
C184946_53.0	LG6	28.9581	LcChr5
C184946_53.0	LG6	28.9581	LcChr5
C213116_60.0	LG6	31.0001	LcChr5
C213116_60.0	LG6	31.0001	LcChr5
C213116_60.0	LG6	31.0001	LcChr5
C213116_60.0	LG6	31.0001	LcChr5
C213116_60.0	LG6	31.0001	LcChr5
C213116_60.0	LG6	31.0001	LcChr5
C172180_55.0	LG6	31.9176	LcChr5
C172180_55.0	LG6	31.9176	LcChr5
C172180_55.0	LG6	31.9176	LcChr5
C103528_14.0	LG6	31.9176	LcChr5
scaffold12129_Locus_10323_0_49.6_LINEAR	LG6	31.9176	LcChr5
C195082_54.0	LG6	31.9176	LcChr5
C216212_61.0	LG6	31.9176	LcChr5
C216212_61.0	LG6	31.9176	LcChr5
C216212_61.0	LG6	31.9176	LcChr5
C216212_61.0	LG6	31.9176	LcChr5
C216212_61.0	LG6	31.9176	LcChr5
C216212_61.0	LG6	31.9176	LcChr5
C216212_61.0	LG6	31.9176	LcChr5
C216212_61.0	LG6	31.9176	LcChr5
C216212_61.0	LG6	31.9176	LcChr5
C216212_61.0	LG6	31.9176	LcChr5
C216212_61.0	LG6	31.9176	LcChr5
C216212_61.0	LG6	31.9176	LcChr5
C216212_61.0	LG6	31.9176	LcChr5
C207780_53.0	LG6	33.4181	LcChr5
C205626_60.0	LG6	33.9231	LcChr5
C205626_60.0	LG6	33.9231	LcChr5
C205626_60.0	LG6	33.9231	LcChr5
C207780_53.0	LG6	33.9231	LcChr5
C197958_52.0	LG6	34.4334	LcChr5
C197958_52.0	LG6	34.4334	LcChr5
C209702_58.0	LG6	34.9188	LcChr5
C210312_57.0	LG6	34.9188	LcChr5
scaffold14076_Locus_13981_0_49.0_COMPLEX	LG6	35.3861	LcChr5
scaffold14076_Locus_13981_0_49.0_COMPLEX	LG6	35.3861	LcChr5
scaffold14076_Locus_13981_0_49.0_COMPLEX	LG6	35.3861	LcChr5
scaffold25392_Locus_46777_0_57.6_LINEAR	LG6	35.907	LcChr5
C199428_58.0	LG6	36.407	LcChr5
C199428_58.0	LG6	36.407	LcChr5
C199428_58.0	LG6	36.407	LcChr5
C213472_58.0	LG6	36.9021	LcChr5
C215110_62.0	LG6	36.9021	LcChr5
C201154_54.0	LG6	36.9021	LcChr5
C199428_58.0	LG6	36.9021	LcChr5
C198074_58.0	LG6	37.3971	LcChr5
scaffold24504_Locus_40103_0_56.4_LINEAR	LG6	37.3971	LcChr5
scaffold22973_Locus_34530_0_54.0_LINEAR	LG6	37.3971	LcChr5
scaffold17170_Locus_20339_0_58.4_FORK	LG6	37.3971	LcChr5
scaffold23203_Locus_35263_0_57.7_FORK	LG6	37.3971	LcChr5
C212224_59.0	LG6	37.3971	LcChr5
C202816_59.0	LG6	37.3971	LcChr5
C190124_58.0	LG6	37.3971	LcChr5
C201034_48.0	LG6	37.3971	LcChr5
scaffold12327_Locus_10716_0_56.9_COMPLEX	LG6	37.3971	LcChr5
Locus_13110_Contig1	LG6	37.8826	LcChr5
Locus_620_Contig1	LG6	37.8826	LcChr5
Locus_15688_Contig1	LG6	37.8826	LcChr5
C205368_56.0	LG6	38.8173	LcChr5
C205368_56.0	LG6	38.8173	LcChr5
C205368_56.0	LG6	38.8173	LcChr5
C210444_56.0	LG6	39.6721	LcChr5
scaffold23672_Locus_36867_0_61.3_FORK	LG6	39.6721	LcChr5
C170650_59.0	LG6	39.6721	LcChr5
scaffold23639_Locus_36717_0_60.6_LINEAR	LG6	39.6721	LcChr5
C210444_56.0	LG6	39.6721	LcChr5
C210444_56.0	LG6	39.6721	LcChr5
C197962_48.0	LG6	41.036	LcChr5
C208544_52.0	LG6	41.5168	LcChr5
C208544_52.0	LG6	41.5168	LcChr5
C208544_52.0	LG6	41.5168	LcChr5
C168914_52.0	LG6	42.5696	LcChr5
C168914_52.0	LG6	42.5696	LcChr5
C200692_56.0	LG6	44.5123	LcChr5
C200692_56.0	LG6	44.5124	LcChr5
C200692_56.0	LG6	44.5124	LcChr5
C212666_59.0	LG6	45.817	LcChr5
C212666_59.0	LG6	45.817	LcChr5
C212666_59.0	LG6	45.817	LcChr5
C212666_59.0	LG6	45.817	LcChr5
C212666_59.0	LG6	45.817	LcChr5
C196784_59.0	LG6	50.5934	LcChr5
C196784_59.0	LG6	50.5934	LcChr5
Locus_37392_Contig1	LG6	51.9956	LcChr5
Locus_37392_Contig1	LG6	51.9956	LcChr5
scaffold3966_Locus_1381_0_58.5_COMPLEX	LG6	52.9391	LcChr5
scaffold3966_Locus_1381_0_58.5_COMPLEX	LG6	52.9391	LcChr5
Locus_31413_Contig1	LG6	52.9391	LcChr5
Locus_31413_Contig1	LG6	52.9391	LcChr5
C206434_59.0	LG6	55.9427	LcChr5
C201422_52.0	LG6	55.9427	LcChr5
C201422_52.0	LG6	55.9427	LcChr5
scaffold13391_Locus_12637_0_45.6_LINEAR	LG6	55.9427	LcChr5
Locus_341_Contig1	LG6	56.8952	LcChr5
C216150_61.0	LG6	59.8398	LcChr5
Locus_15833_Contig1	LG6	60.3028	LcChr5
scaffold6078_Locus_2301_0_52.0_FORK	LG6	61.2463	LcChr6
scaffold6078_Locus_2301_0_52.0_FORK	LG6	61.2463	LcChr6
scaffold6078_Locus_2301_0_52.0_FORK	LG6	61.2463	LcChr6
scaffold6078_Locus_2301_0_52.0_FORK	LG6	61.2463	LcChr6
[truncated: 365 more rows]
